# Supplementary material for: Synthesis, Molecular Docking Analysis and Biological Evaluations of Saccharide-Modified Thiadiazole Sulfonamide Derivatives
Source: MDPI journal article supplement (doi:10.3390/ijms22115482), 2021-05-22
Supplement: s1 [file s1]

# Supporting Information

## Synthesis, Molecular Docking Analysis and Biological Evaluations of Saccharide-modified Thiadiazole Sulfonamide Derivatives

Zuo-Peng Zhang, Ye Zhong, Zhen-Bin Han, Lin Zhou, Hua-Sheng Su, Jian Wang,  
Yang Liu\*, Mao-Sheng Cheng\*

### Table of Contents

|                                                         |    |
|---------------------------------------------------------|----|
| <sup>1</sup> H-NMR and <sup>13</sup> C-NMR Spectra..... | 2  |
| 2D-NMR Spectra .....                                    | 29 |
| Modes of binding figures .....                          | 32 |
| Supplementary data .....                                | 33 |

# $^1\text{H}$ -NMR and $^{13}\text{C}$ -NMR Spectra

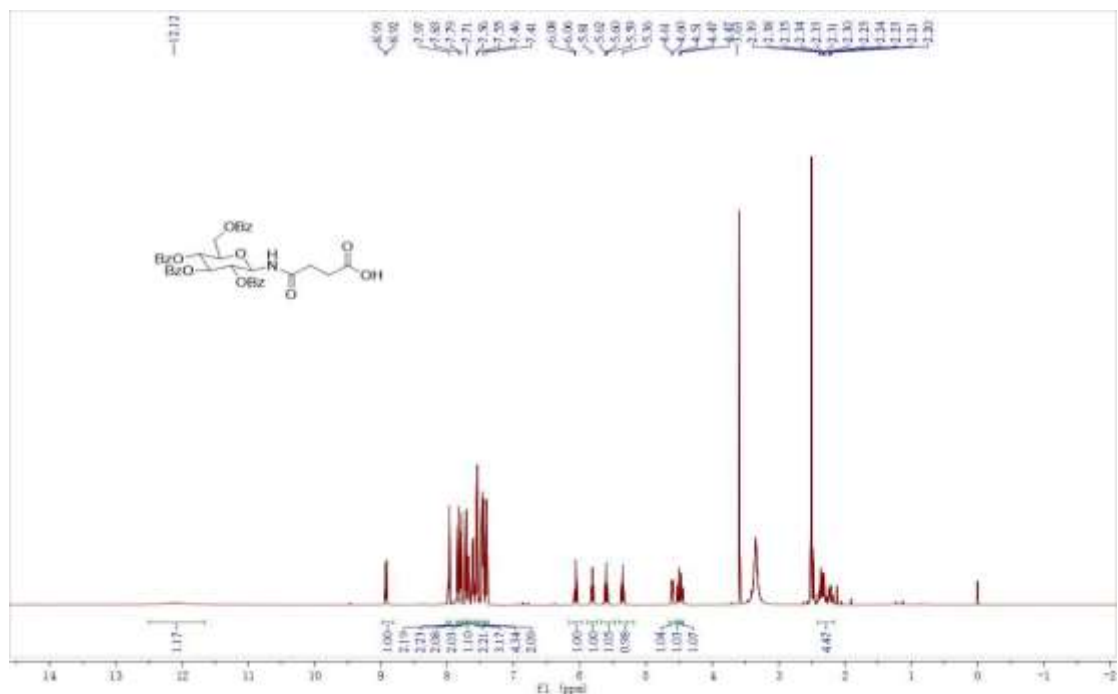

Figure S1. The  $^1\text{H}$ -NMR of intermediate 5a.

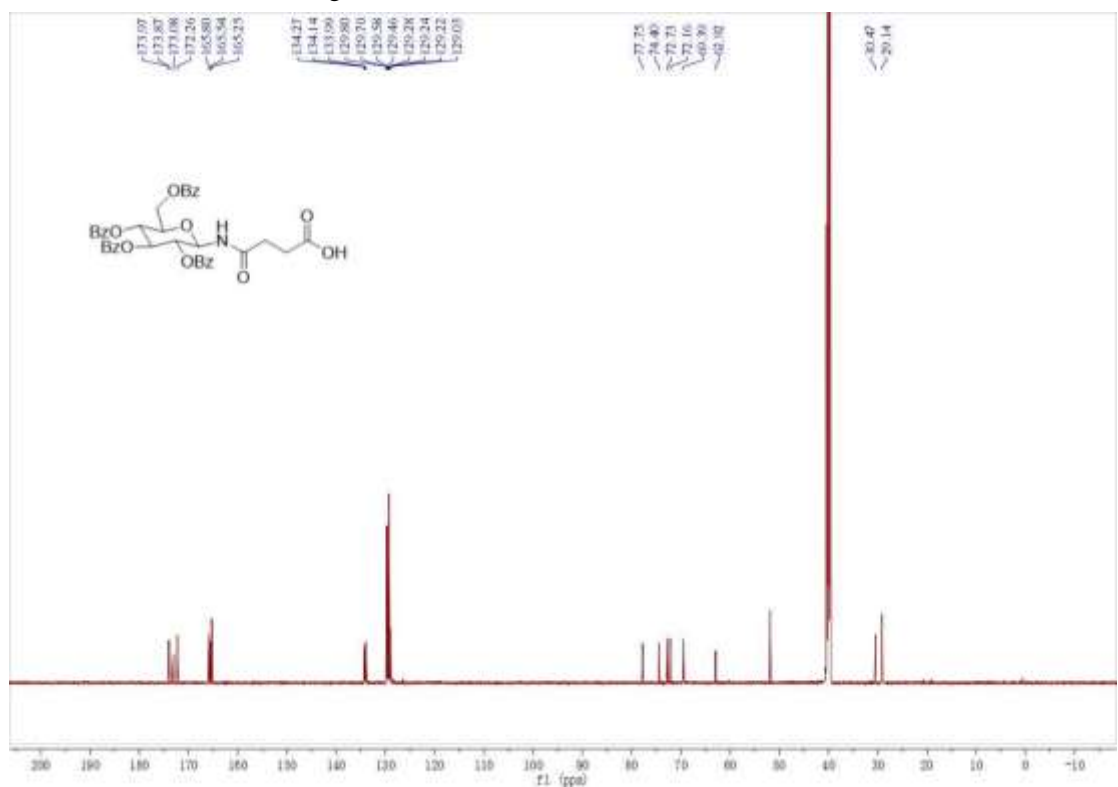

Figure S2. The  $^{13}\text{C}$ -NMR of intermediate 5a.

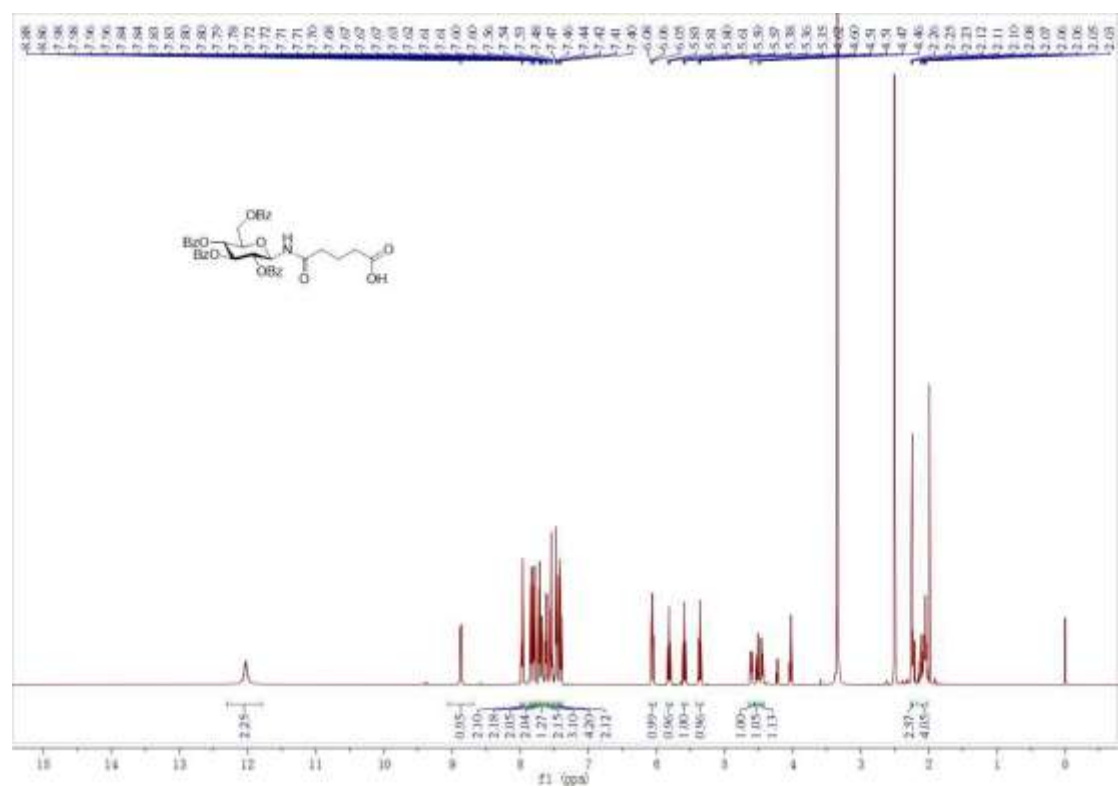

Figure S3. The <sup>1</sup>H-NMR of intermediate 5b.

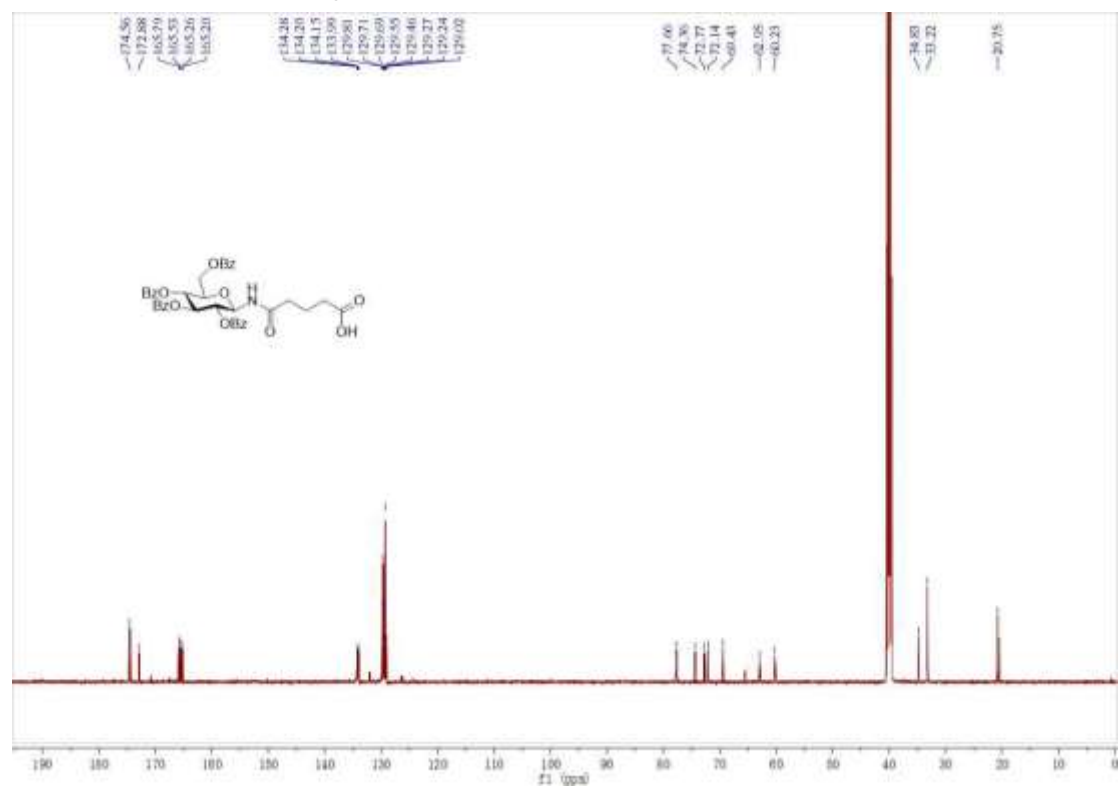

Figure 4. The <sup>13</sup>C-NMR of intermediate 5b.

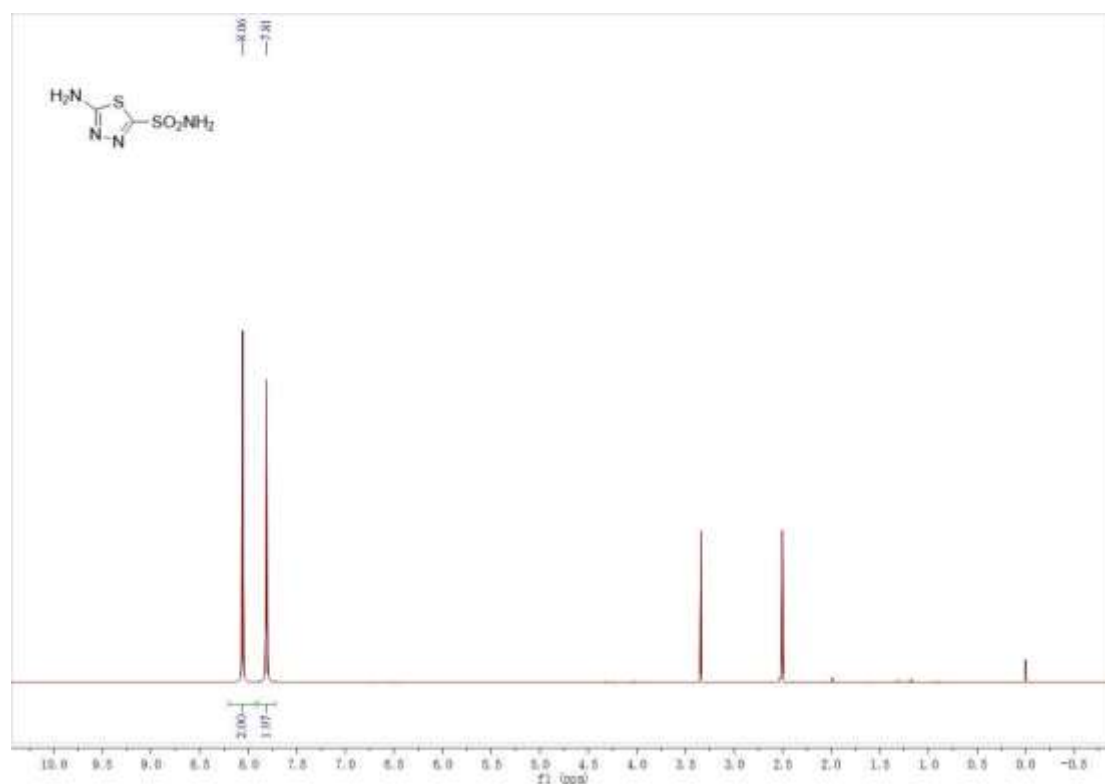

Figure S5. The  $^1\text{H}$ -NMR of intermediate 10.

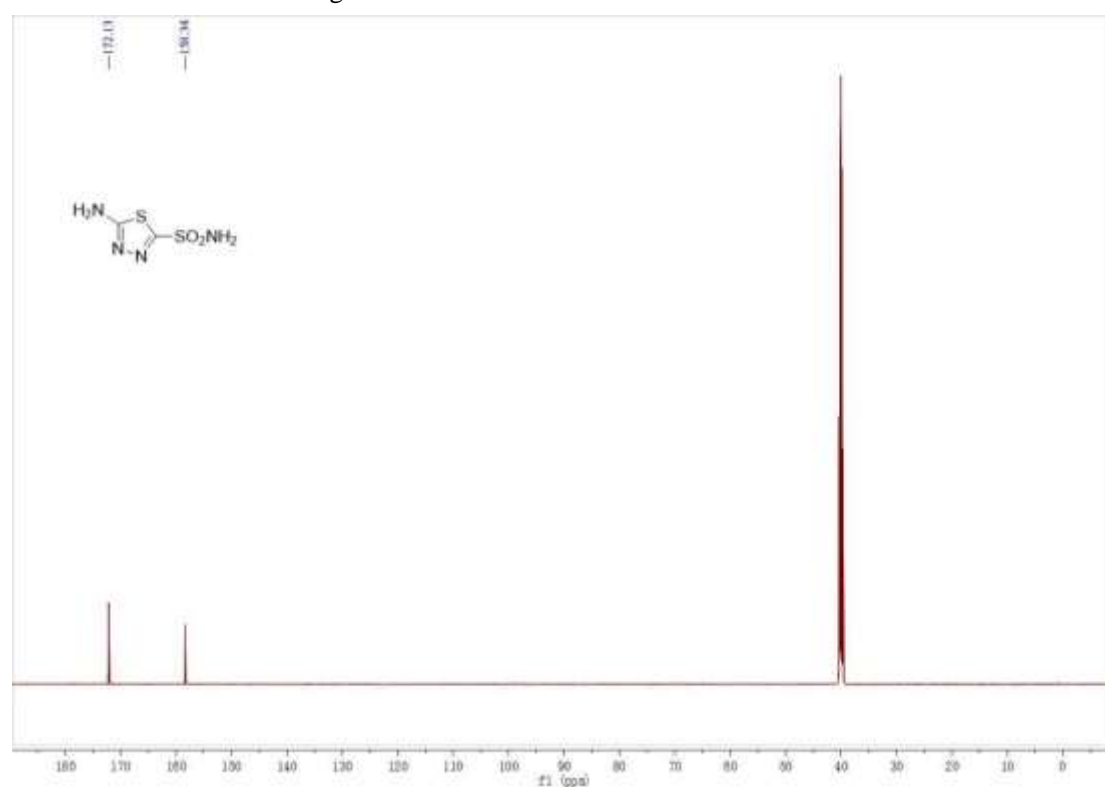

Figure S6. The  $^{13}\text{C}$ -NMR of intermediate 10.

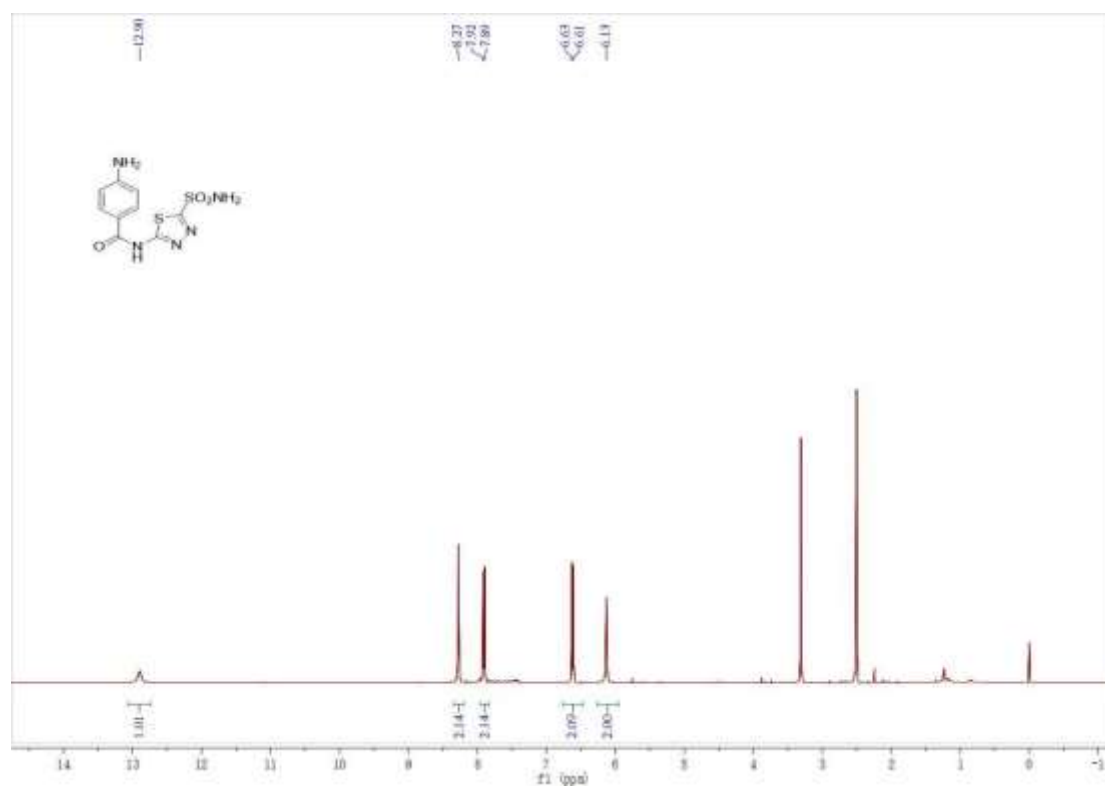

Figure S7. The <sup>1</sup>H-NMR of intermediate 12a.

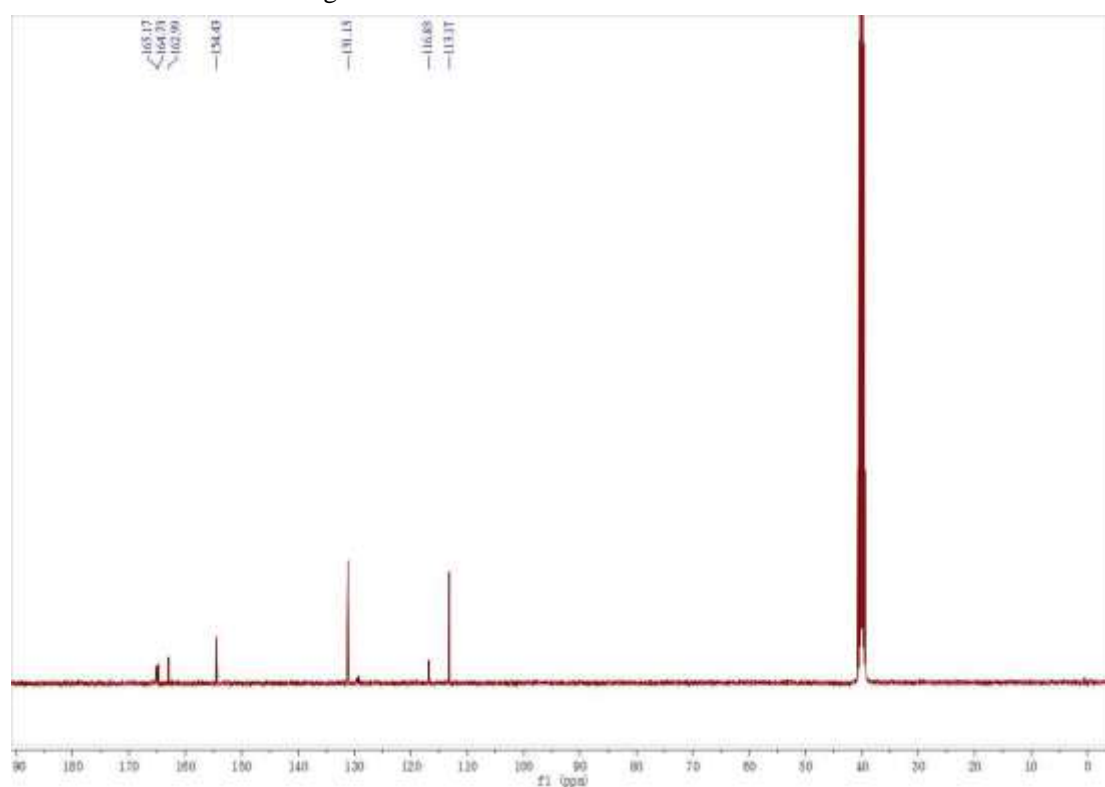

Figure S8. The <sup>13</sup>C-NMR of intermediate 12a.

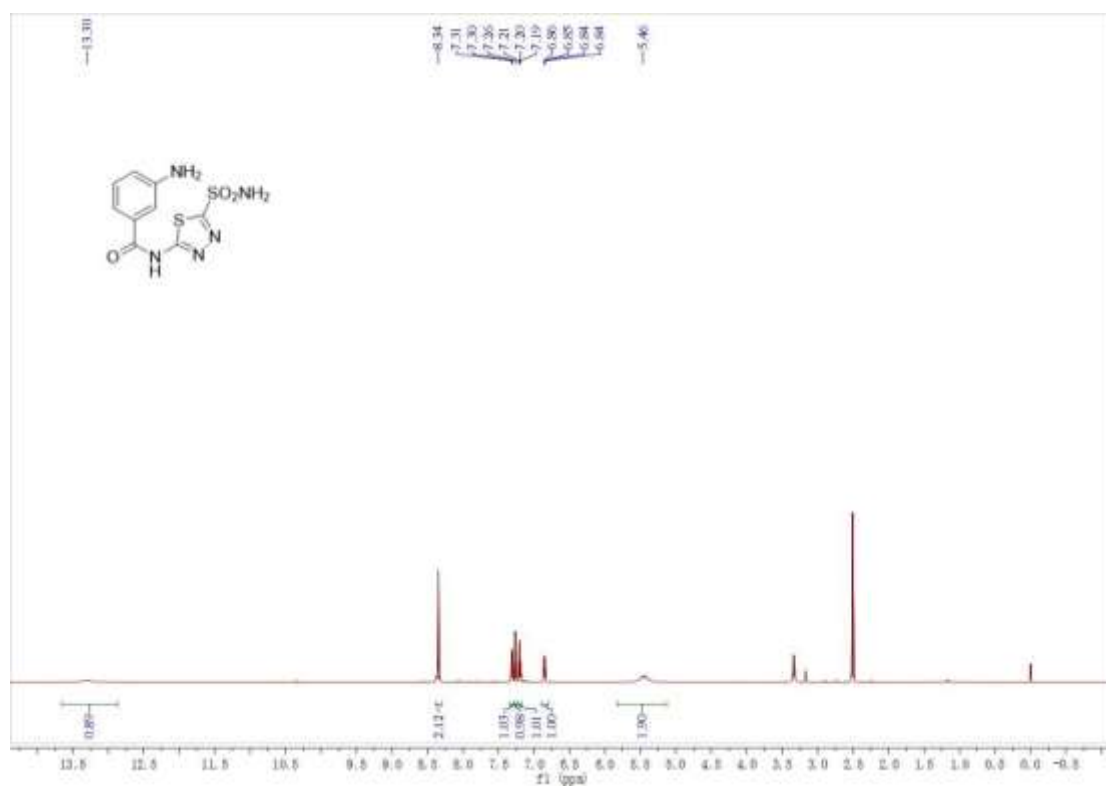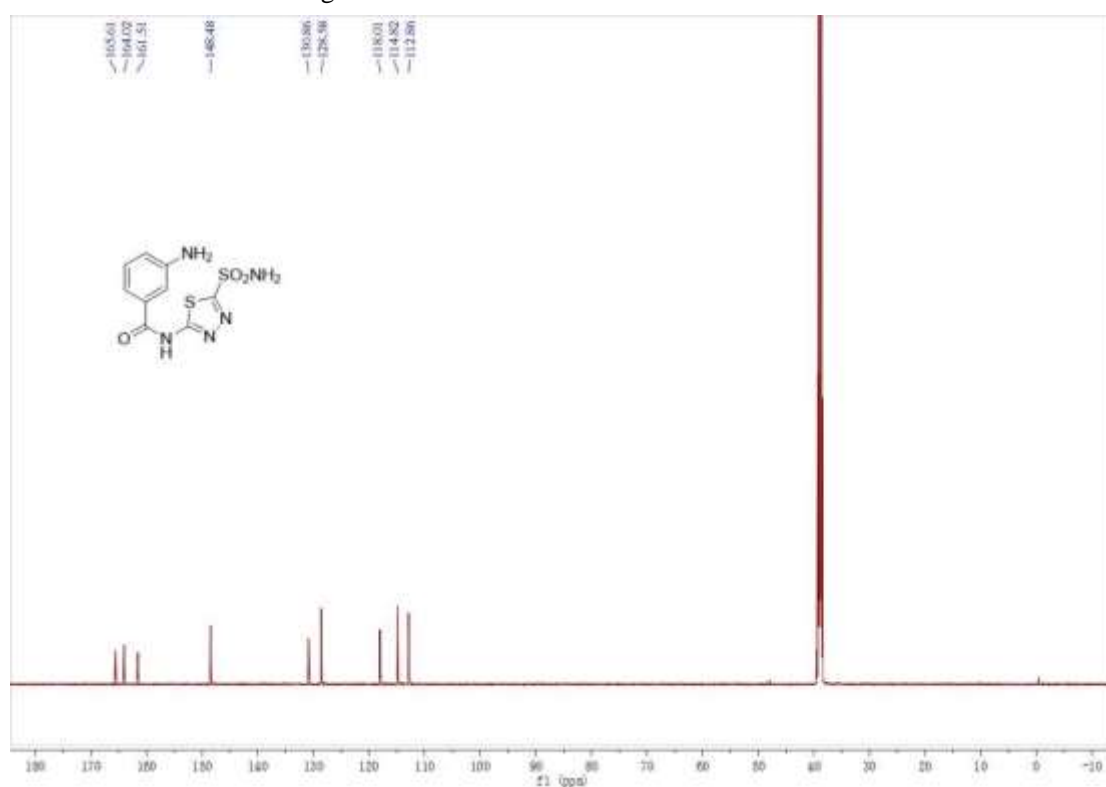

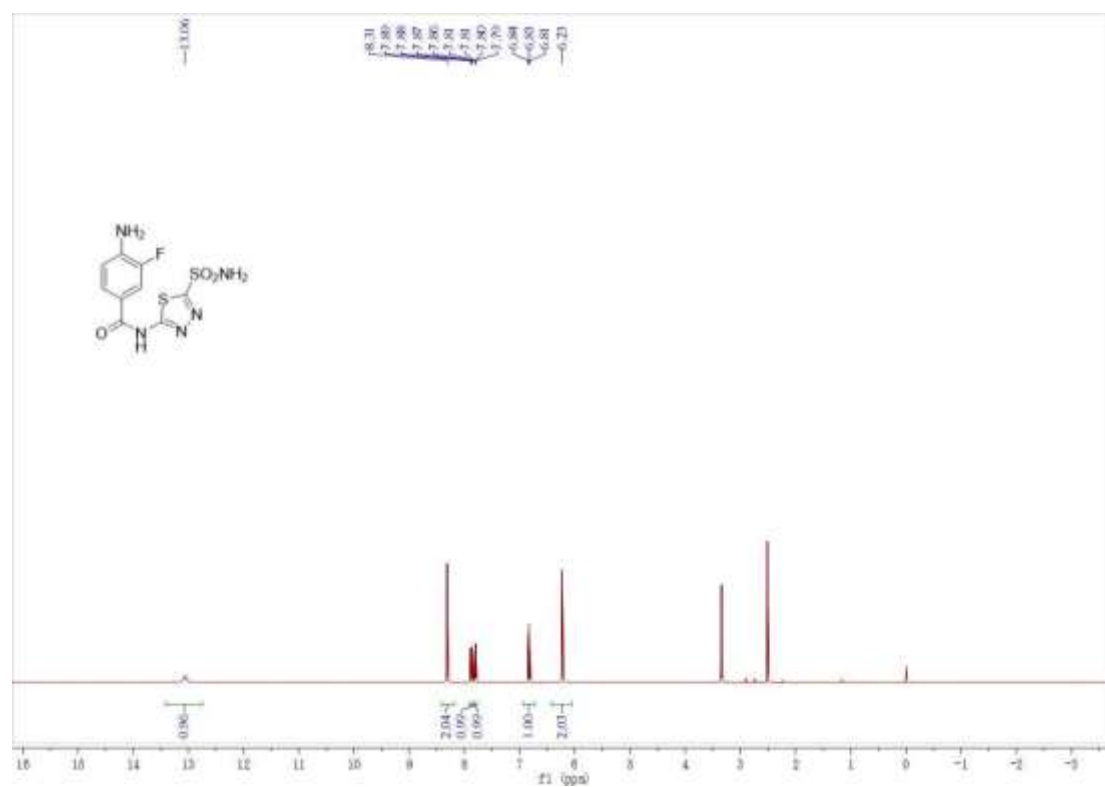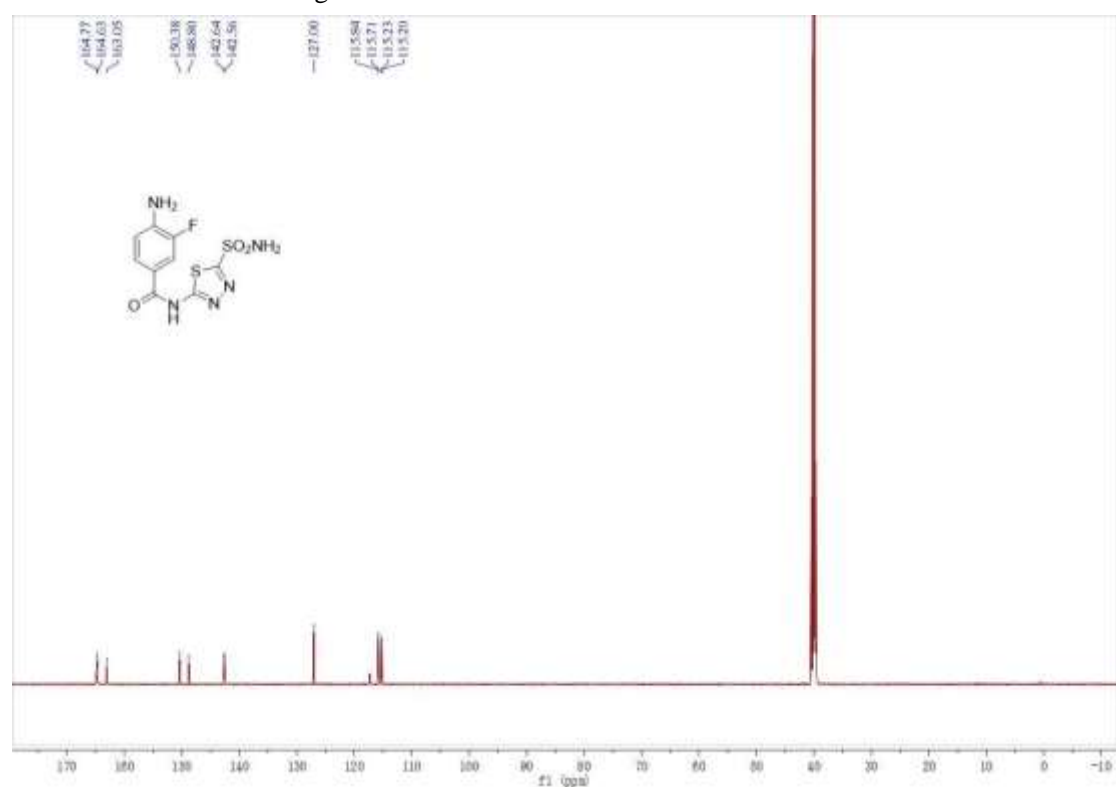

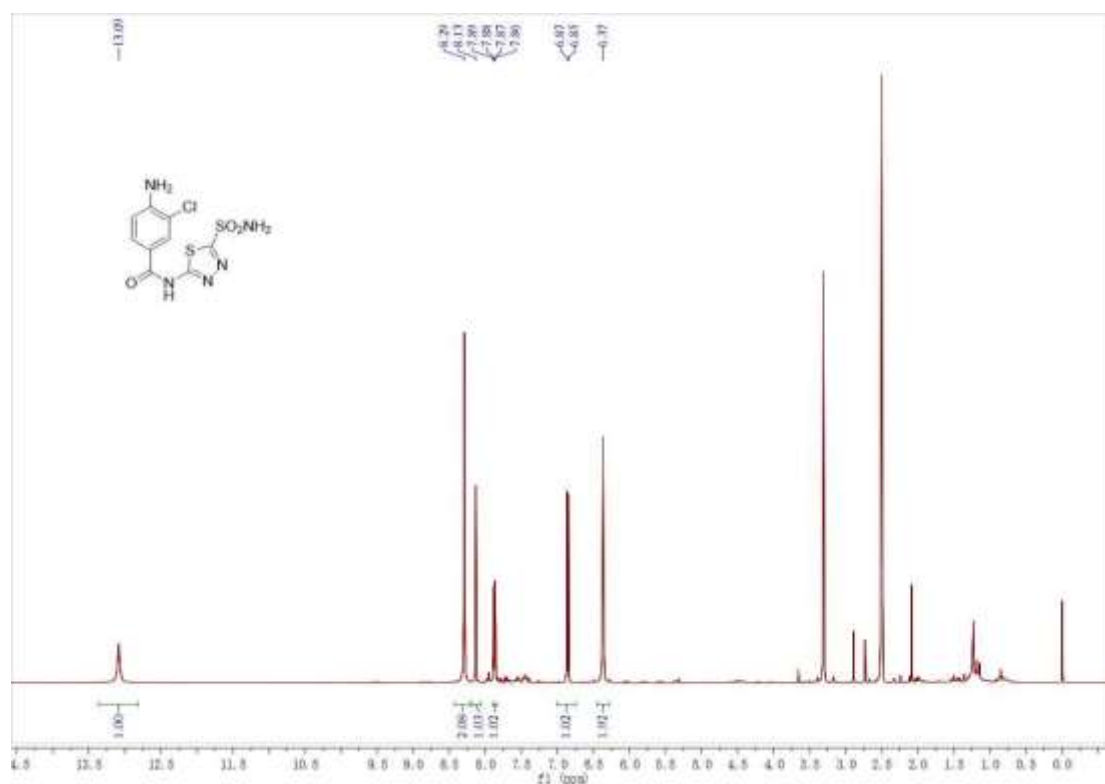

Figure S13. The <sup>1</sup>H-NMR of intermediate 12d.

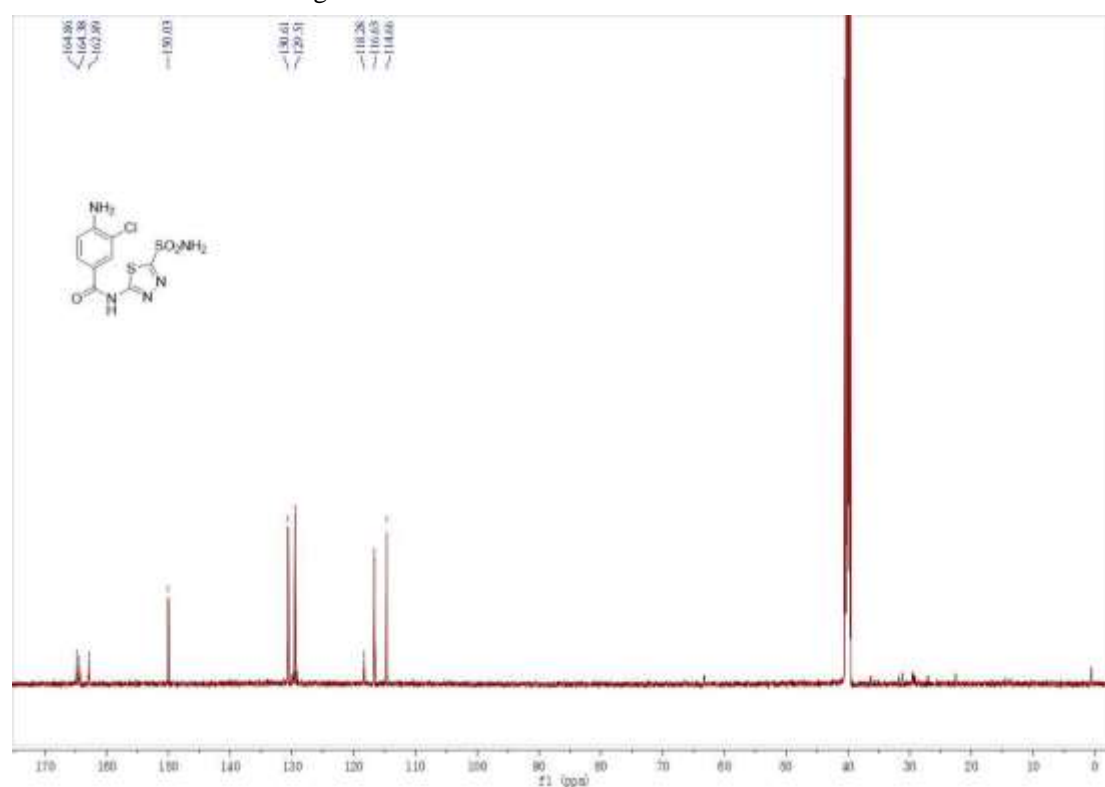

Figure S14. The <sup>13</sup>C-NMR of intermediate 12d.



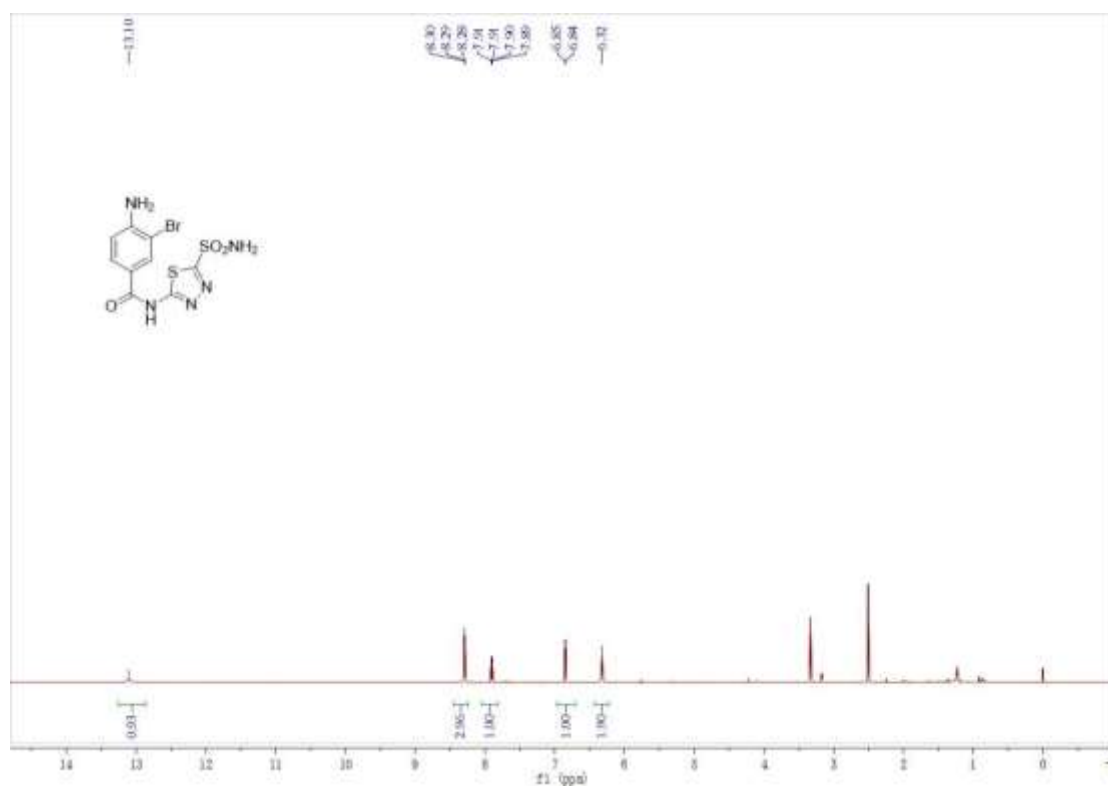

Figure S15. The <sup>1</sup>H-NMR of intermediate 12e.

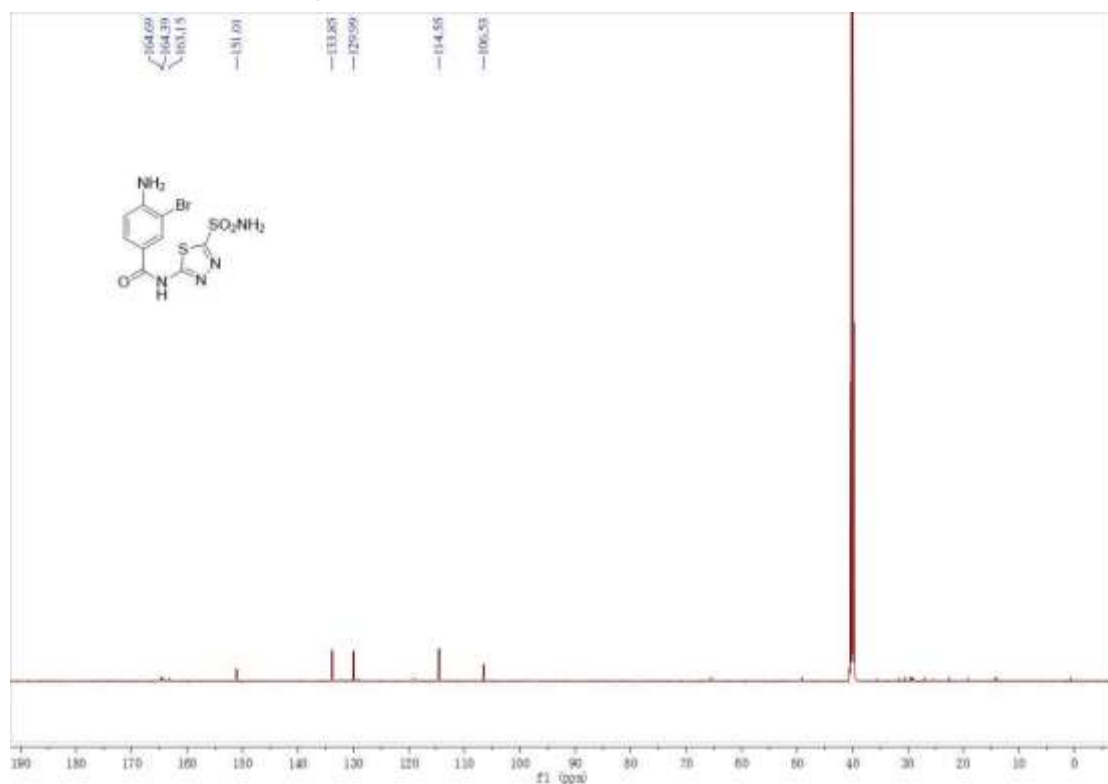

Figure S16. The <sup>13</sup>C-NMR of intermediate 12e.

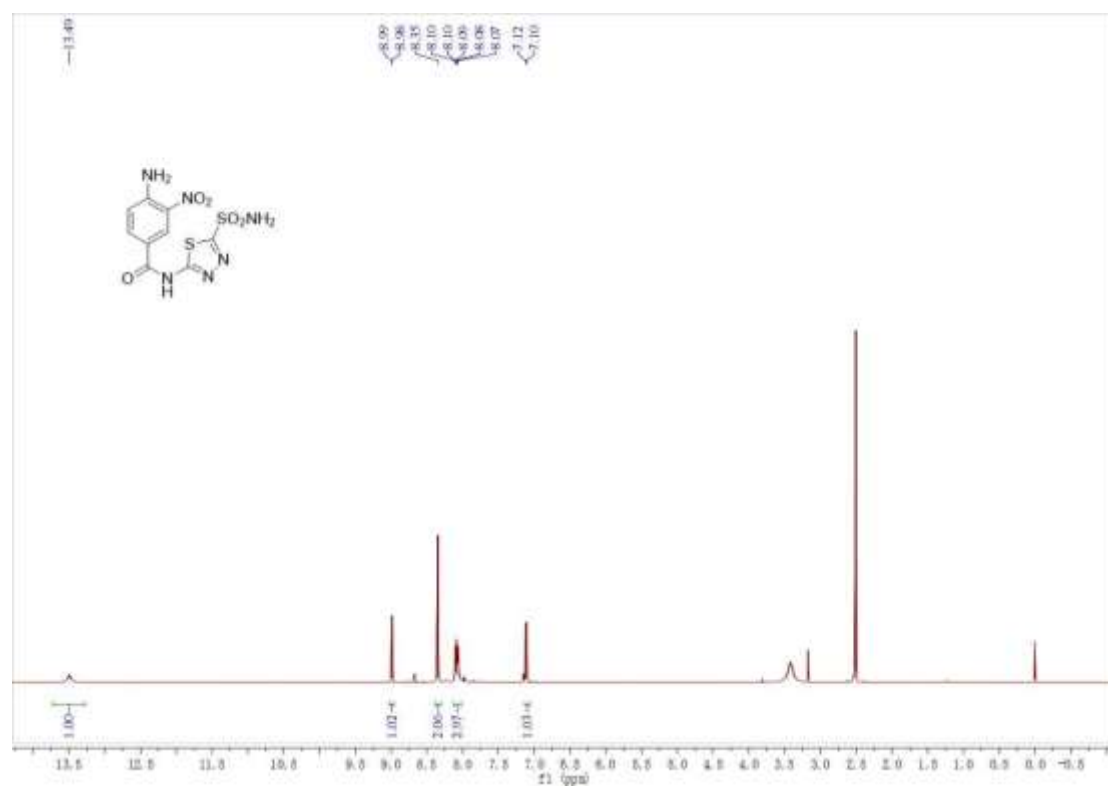

Figure S17. The <sup>1</sup>H-NMR of intermediate 12f.

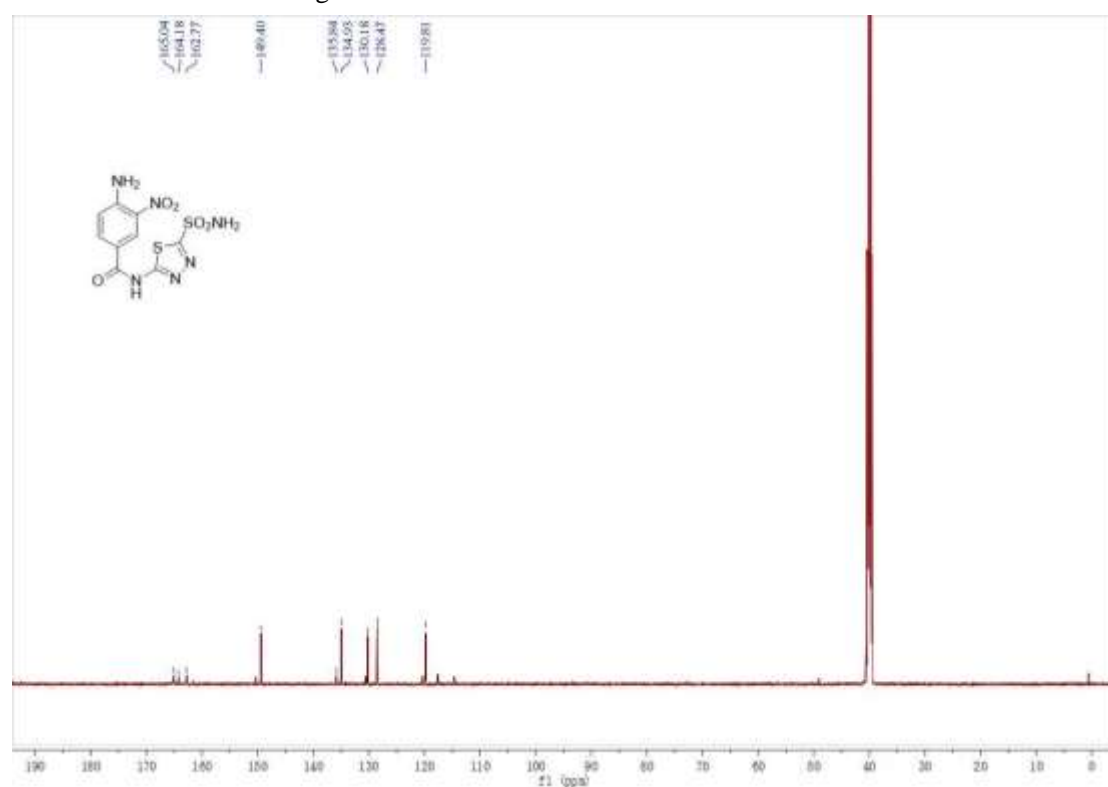

Figure S18. The <sup>13</sup>C-NMR of intermediate 12f.

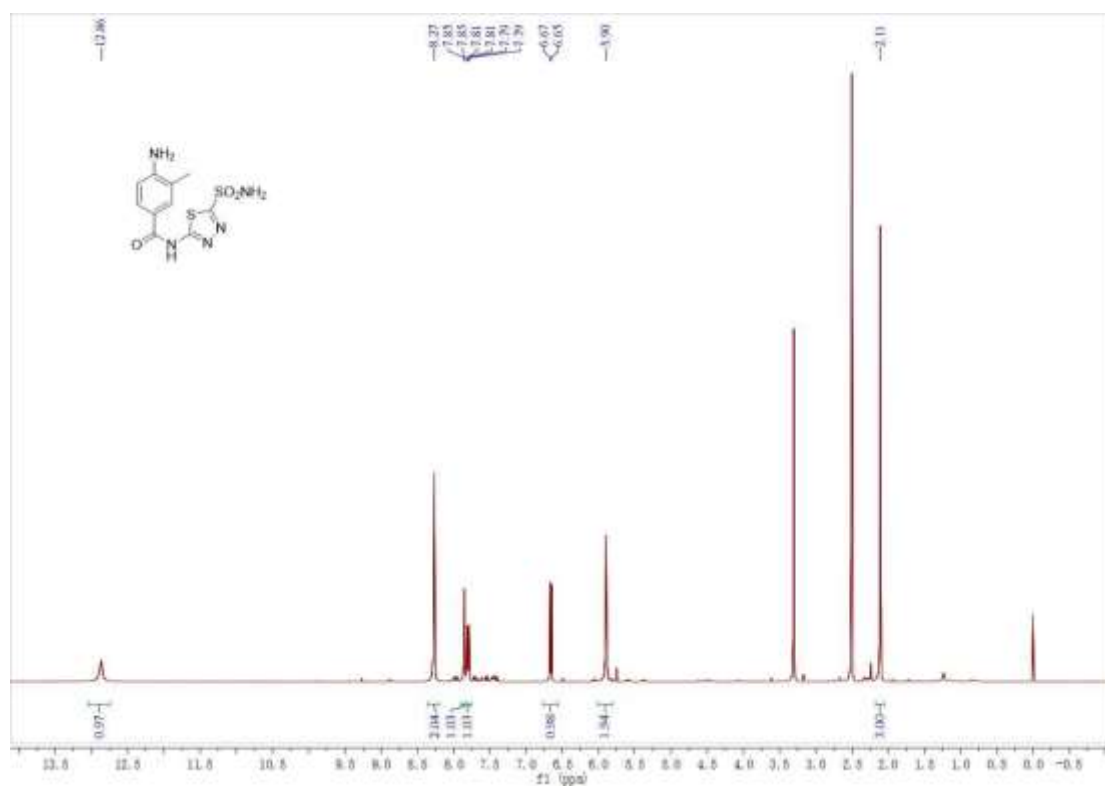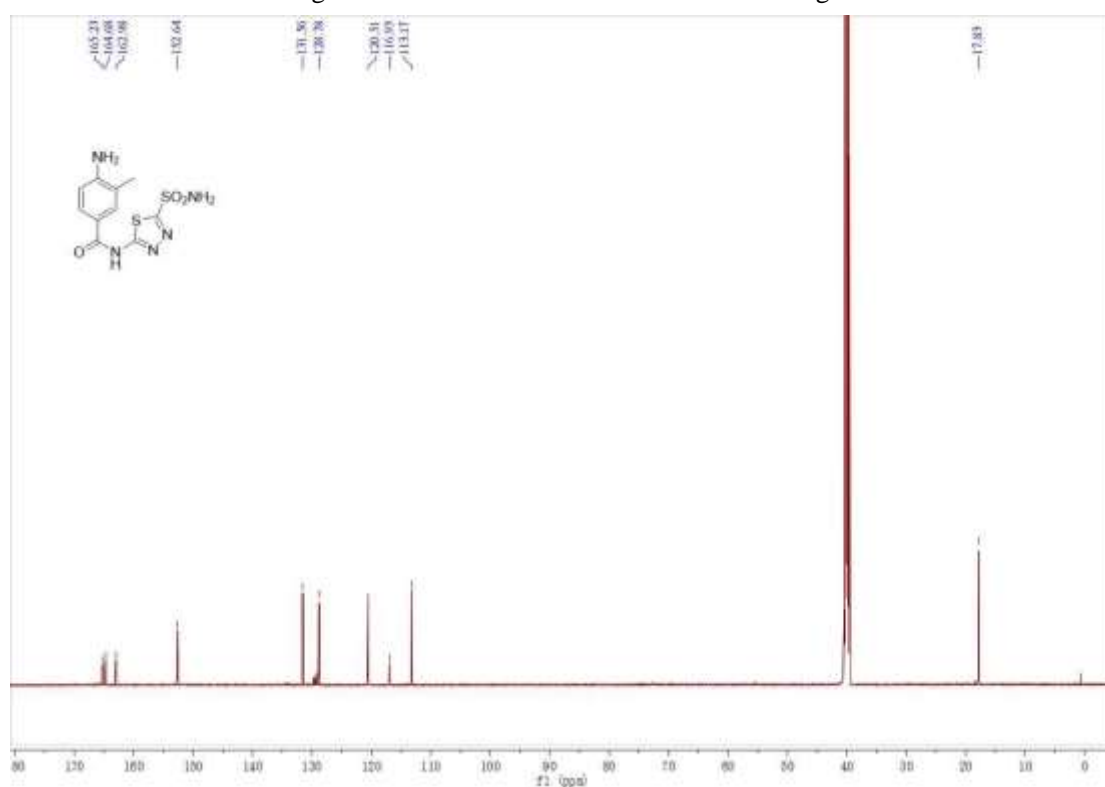

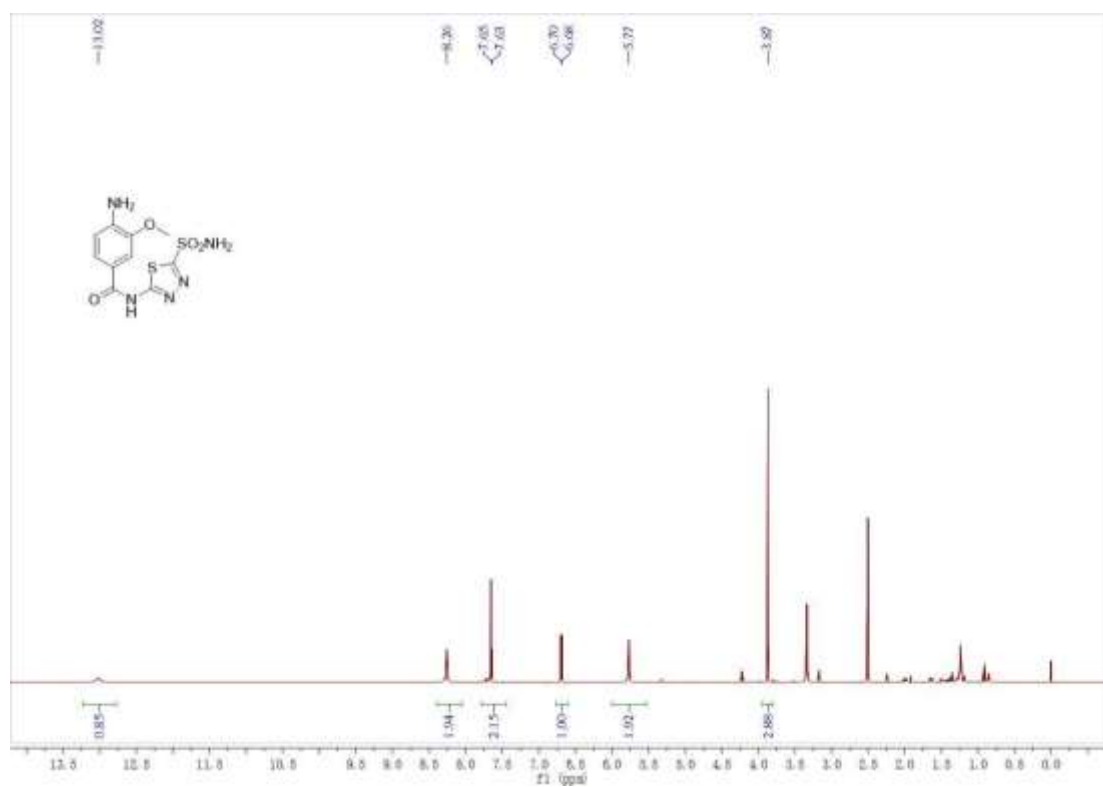

Figure S21. The <sup>1</sup>H-NMR of intermediate 12h.

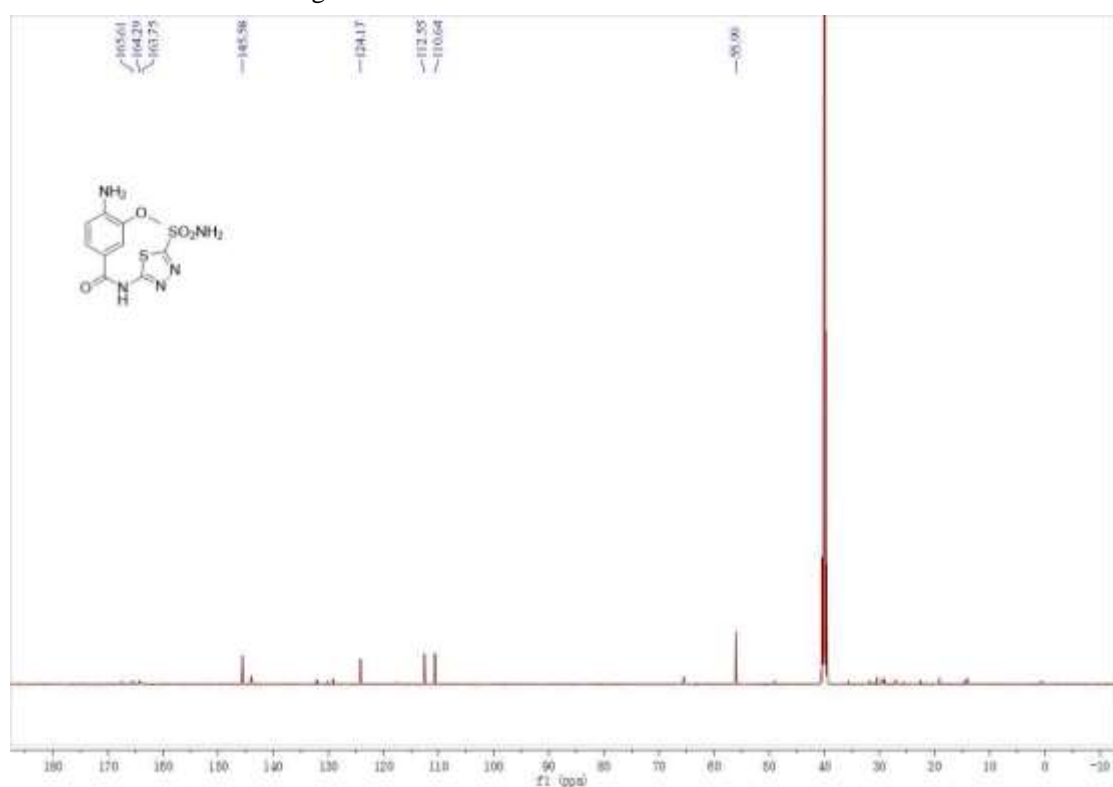

Figure S22. The <sup>13</sup>C-NMR of intermediate 12h.

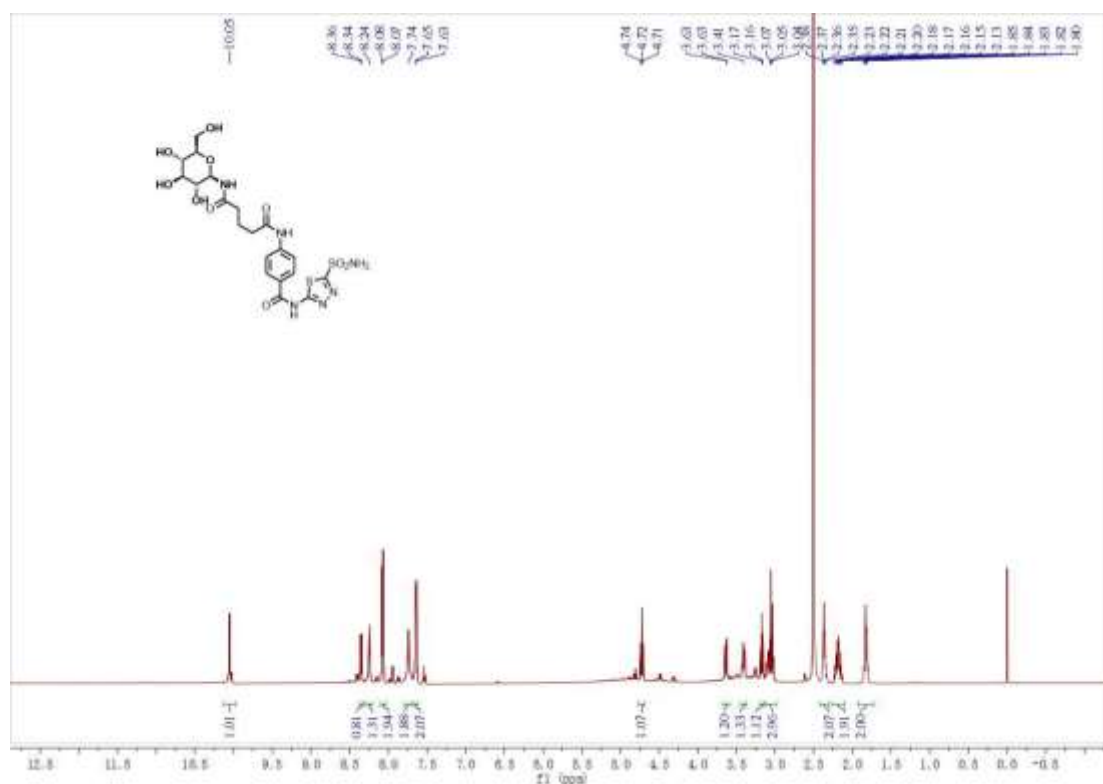

Figure S23. The  $^1\text{H}$ -NMR of compound 14a.

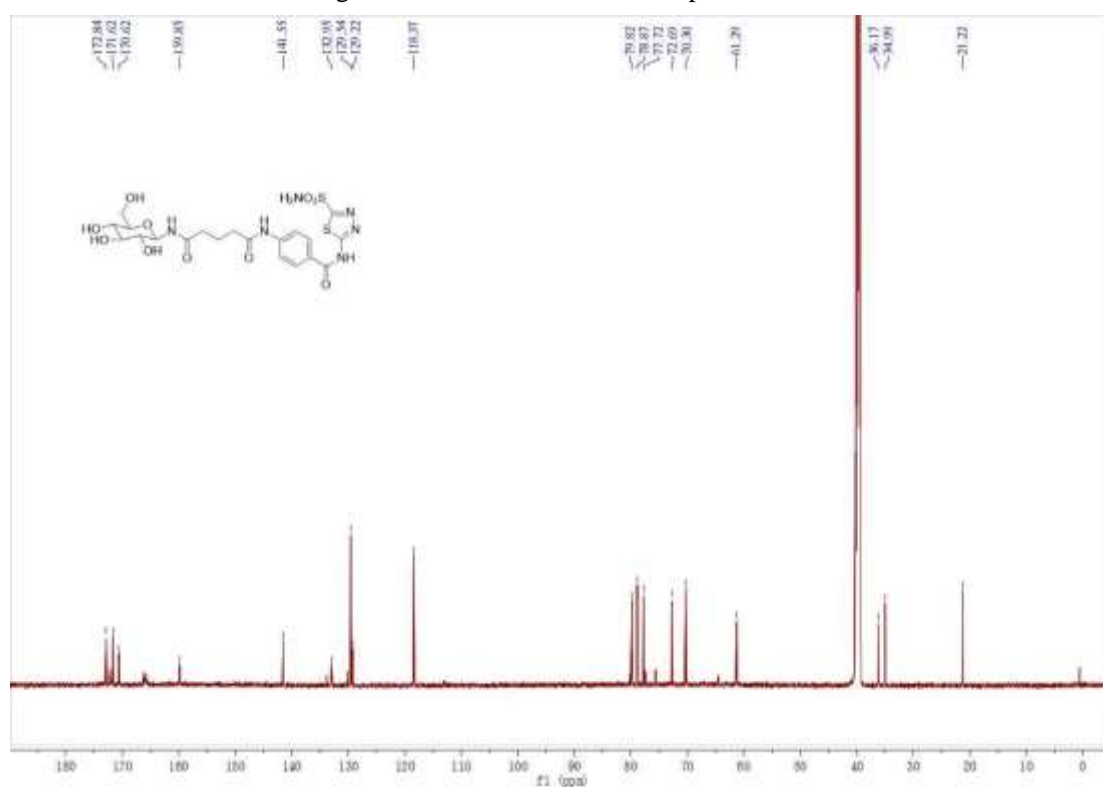

Figure S24. The  $^{13}\text{C}$ -NMR of compound 14a.

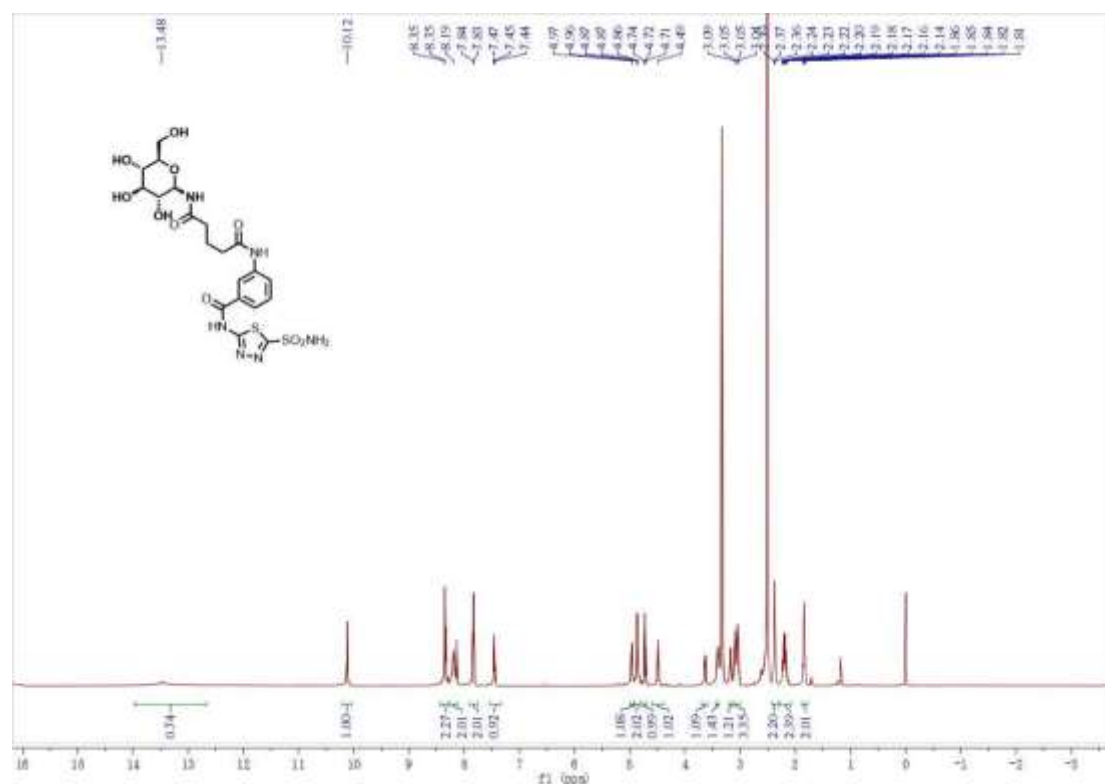

Figure S25. The  $^1\text{H}$ -NMR of compound 14b.

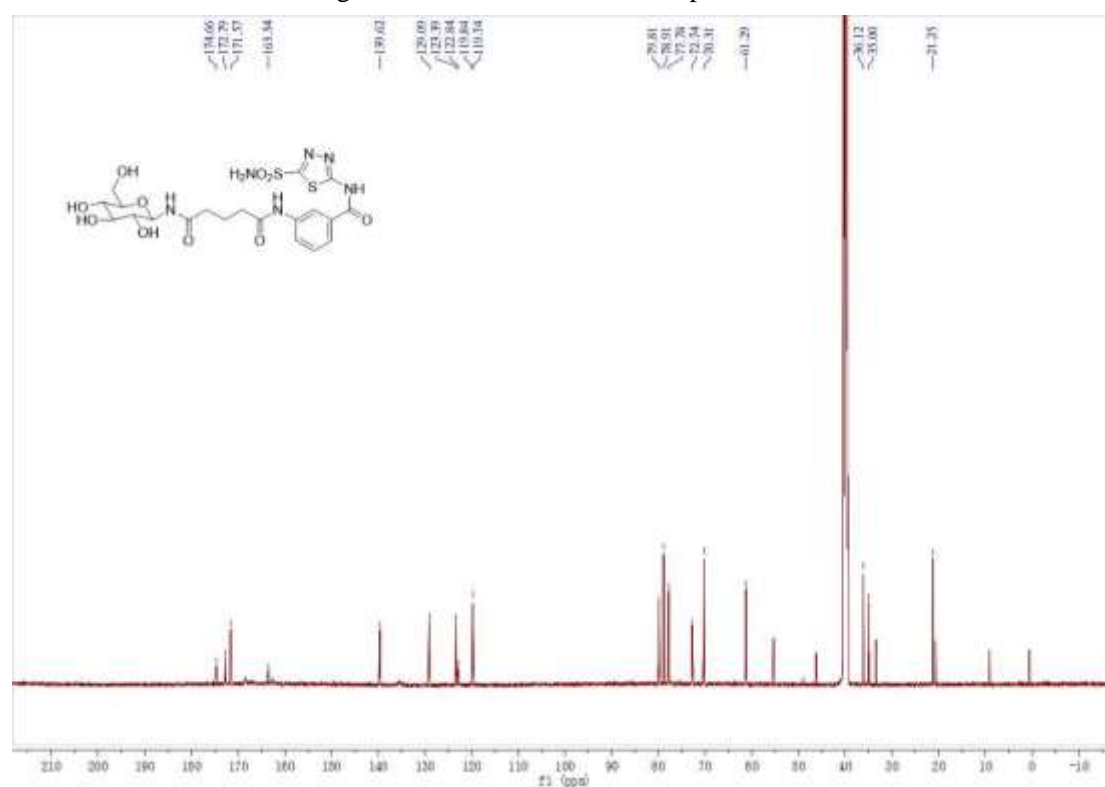

Figure S26. The  $^{13}\text{C}$ -NMR of compound 14b.

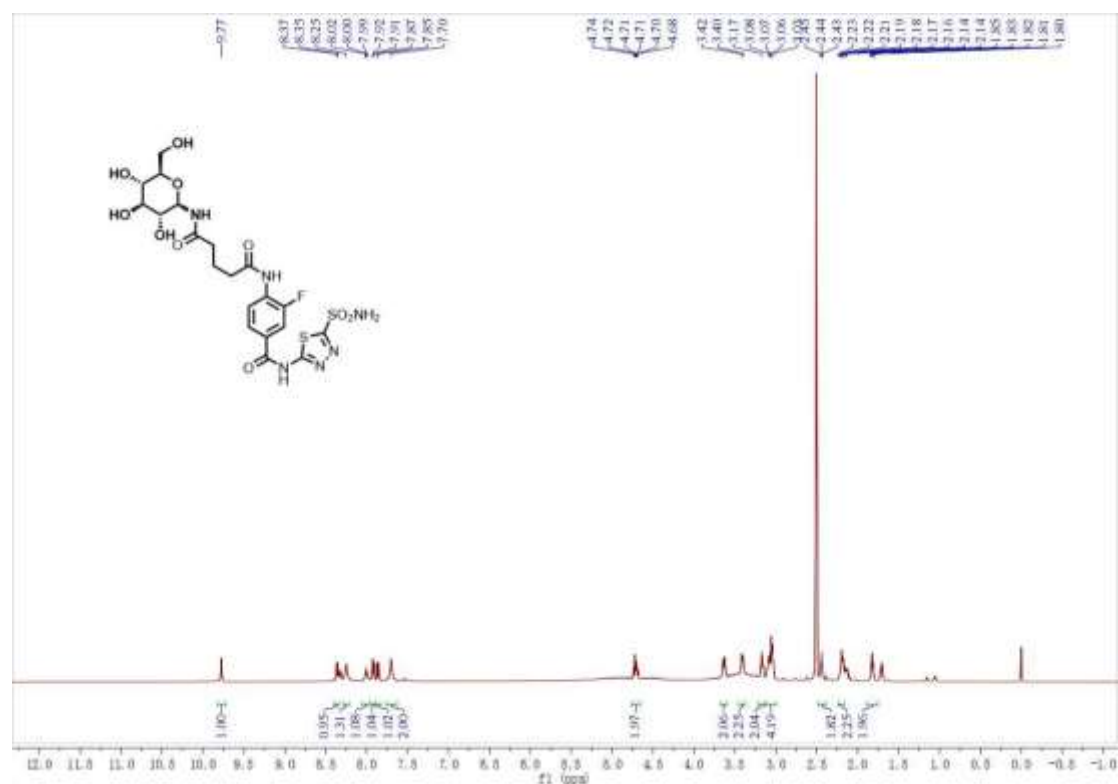

Figure S27. The  $^1\text{H}$ -NMR of compound 14c.

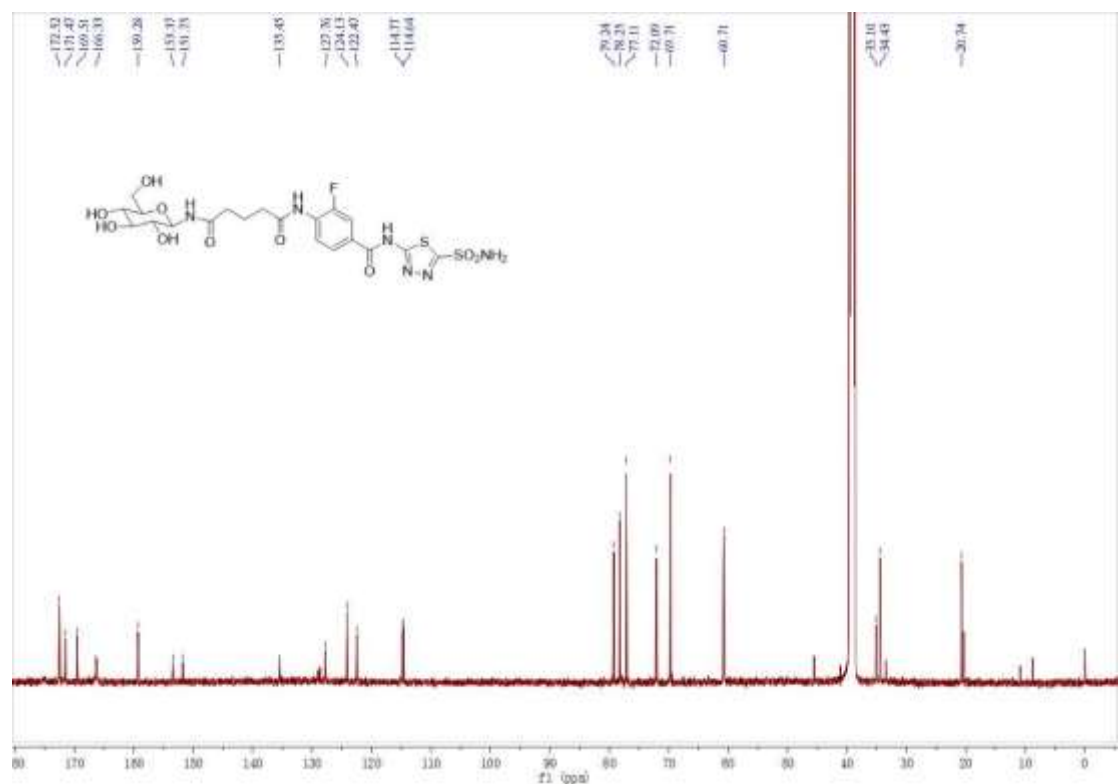

Figure S28. The  $^{13}\text{C}$ -NMR of compound 14c.

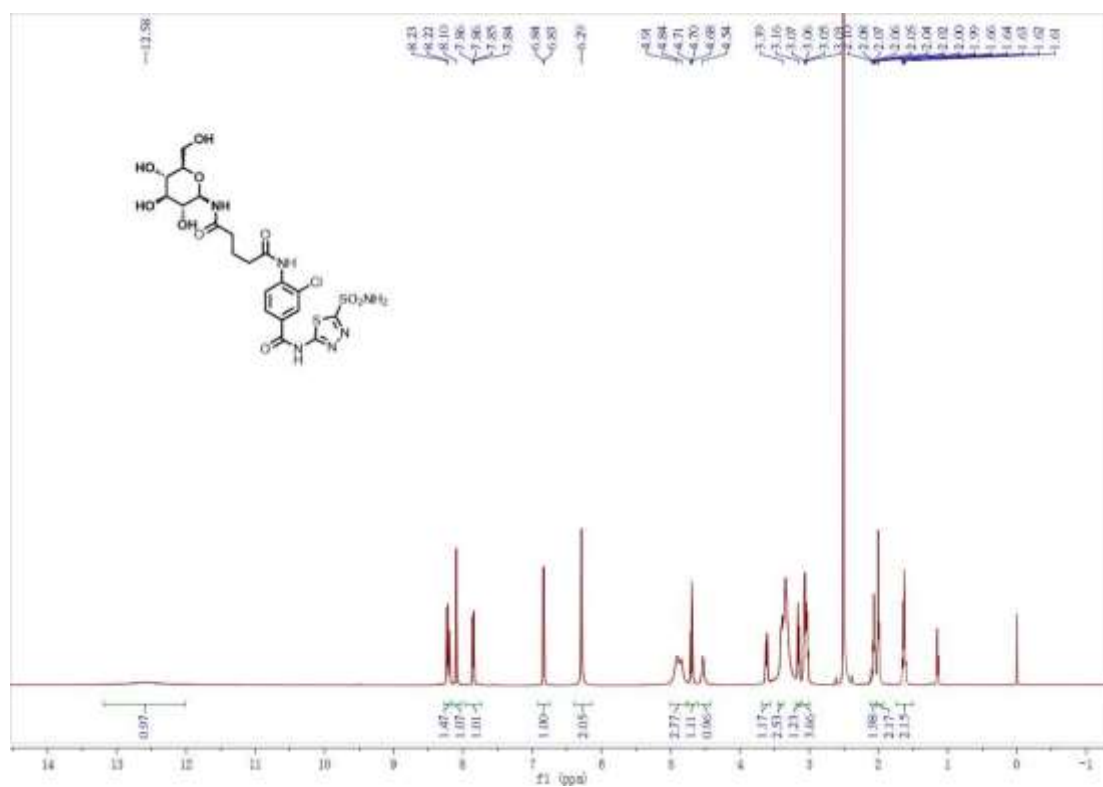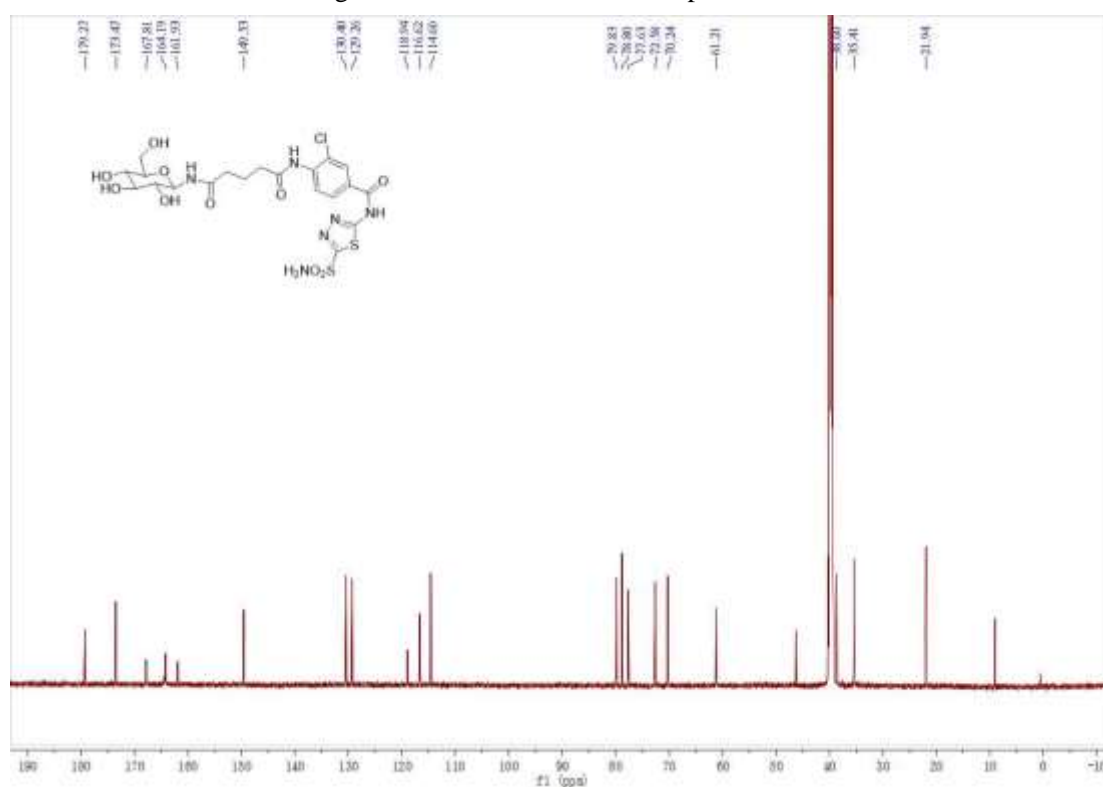



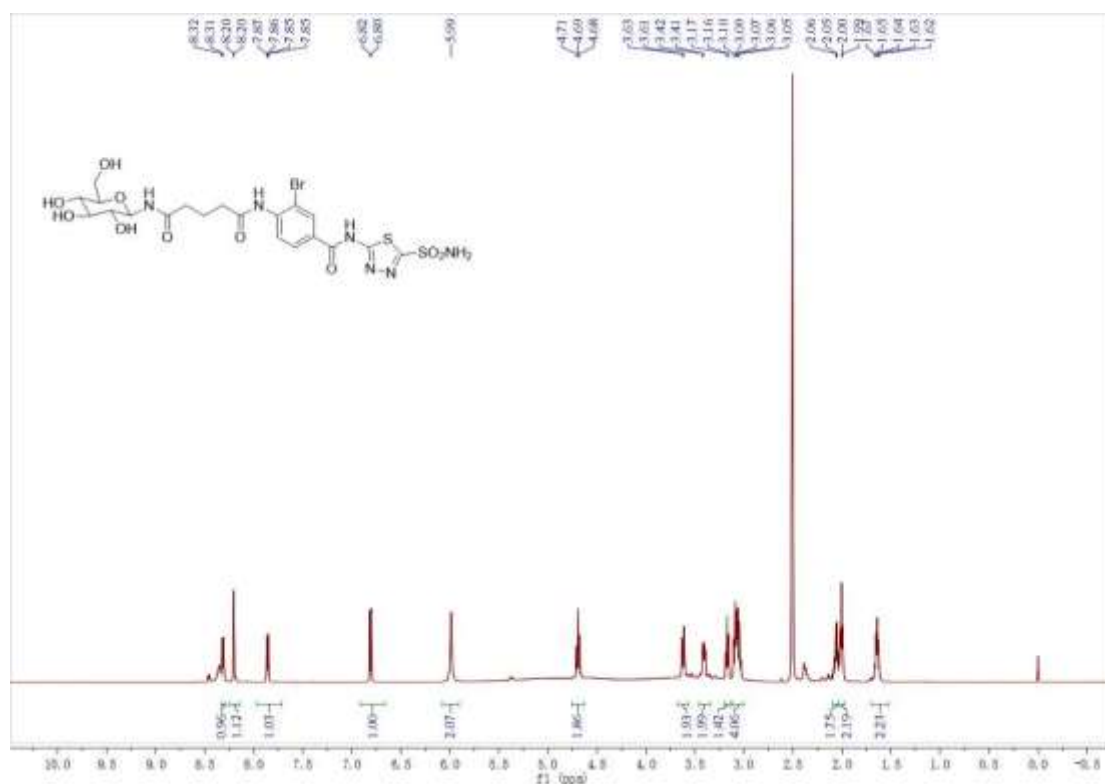

Figure S31. The <sup>1</sup>H-NMR of compound 14e.

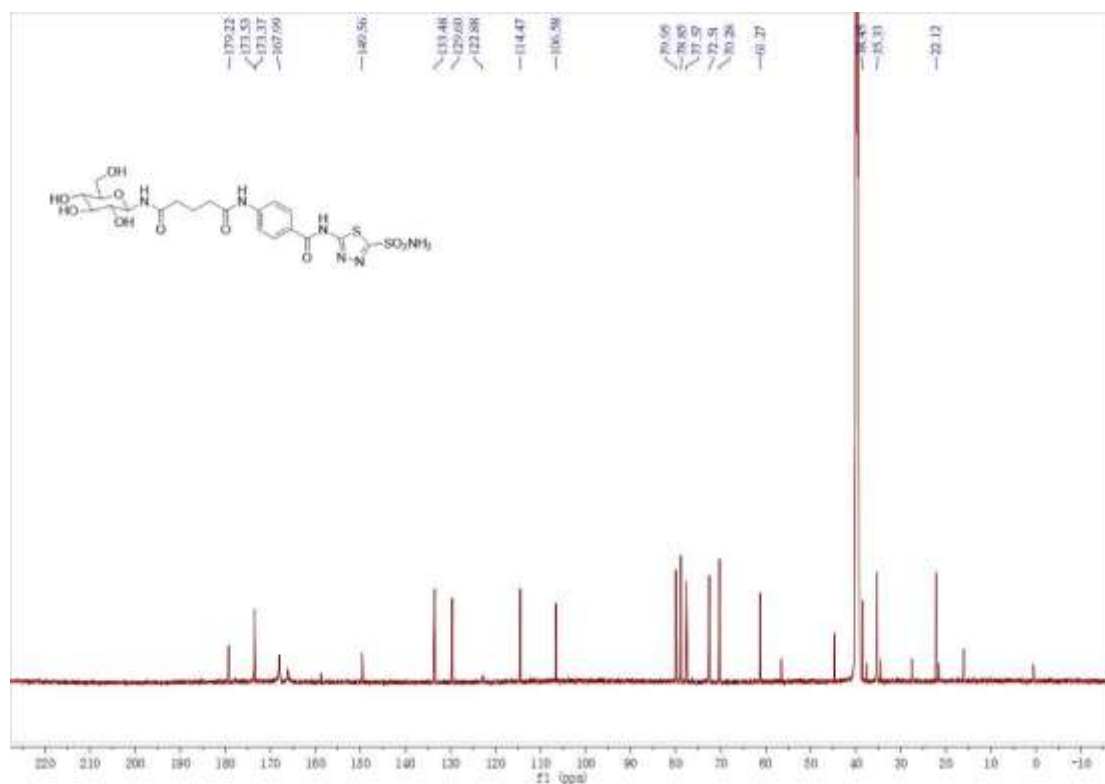

Figure S32. The <sup>13</sup>C-NMR of compound 14e.

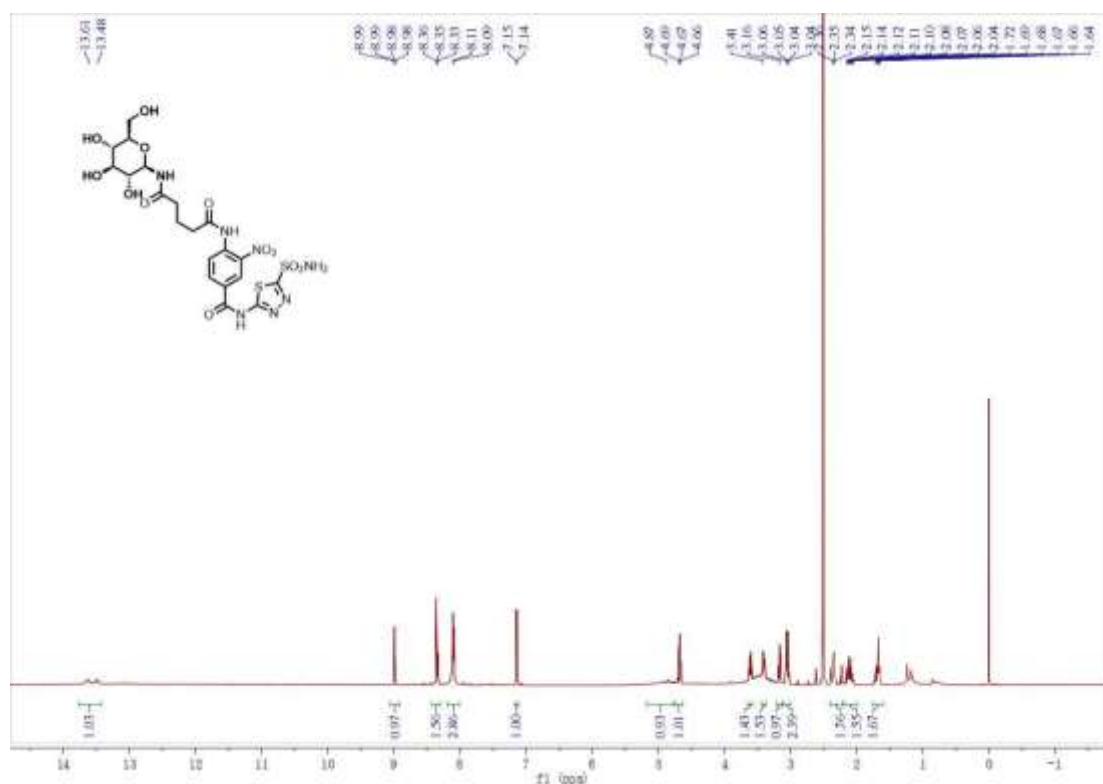

Figure S33. The  $^1\text{H}$ -NMR of compound 14f.

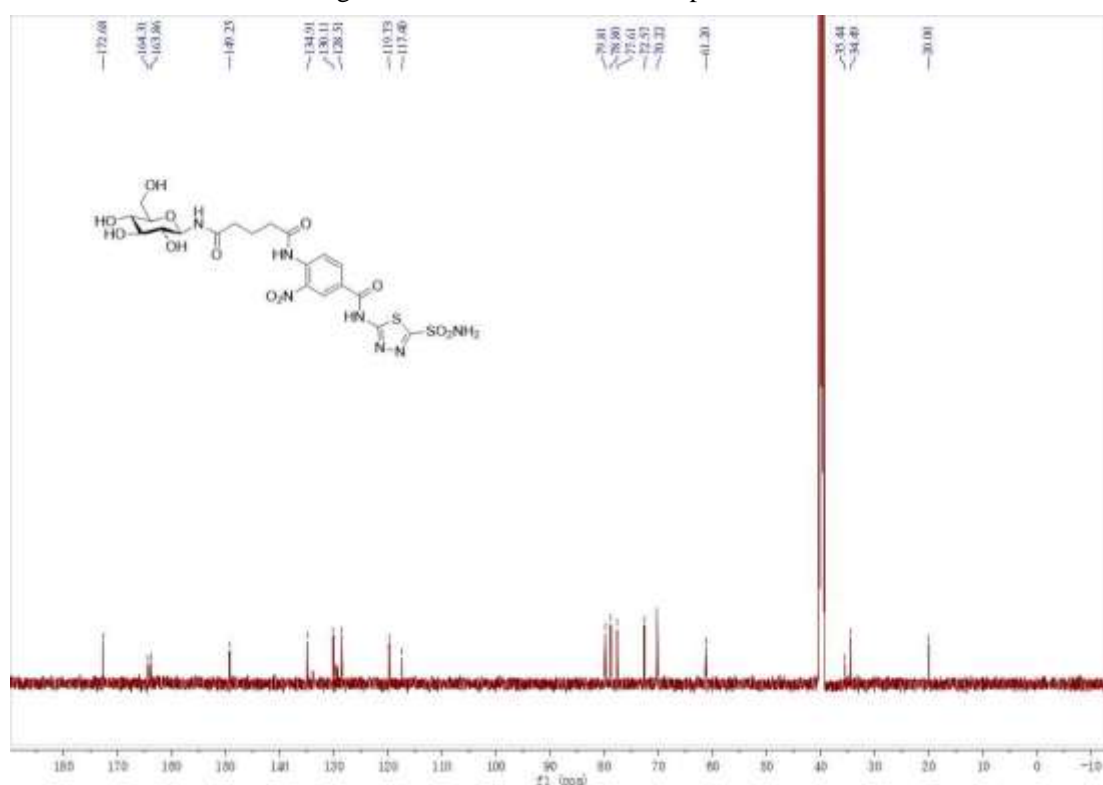

Figure S34. The  $^{13}\text{C}$ -NMR of compound 14f.

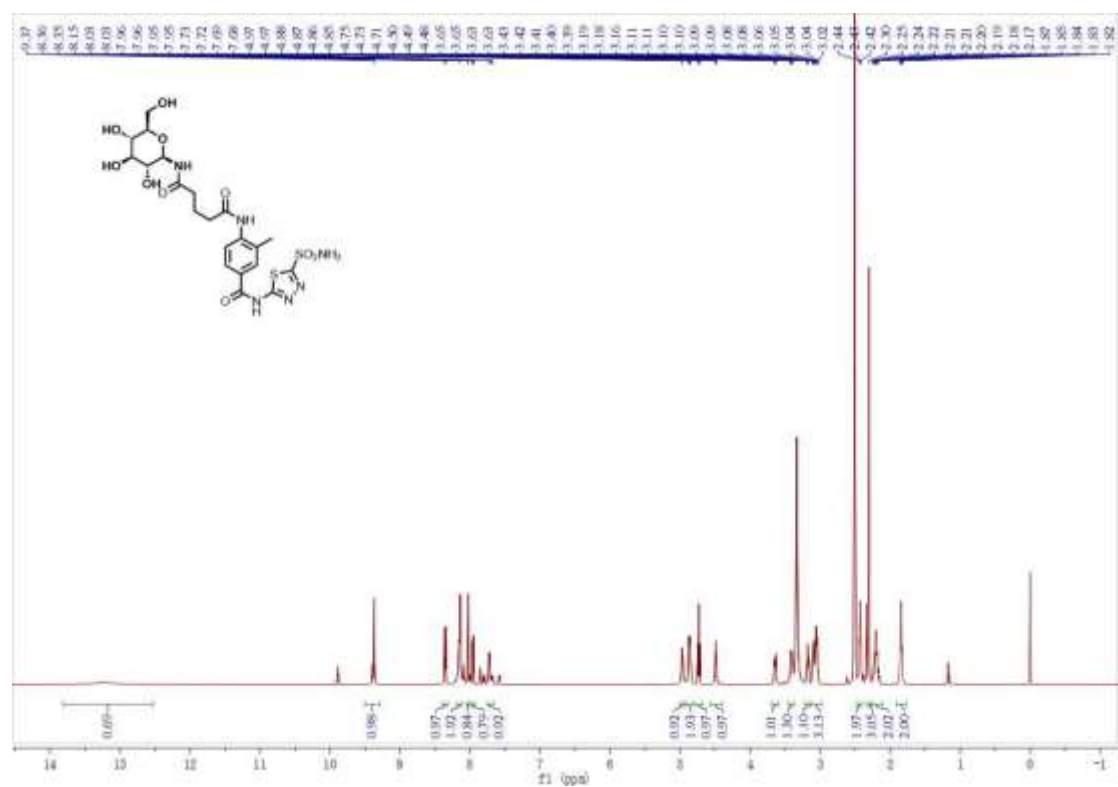

Figure S35. The  $^1\text{H}$ -NMR of compound 14g.

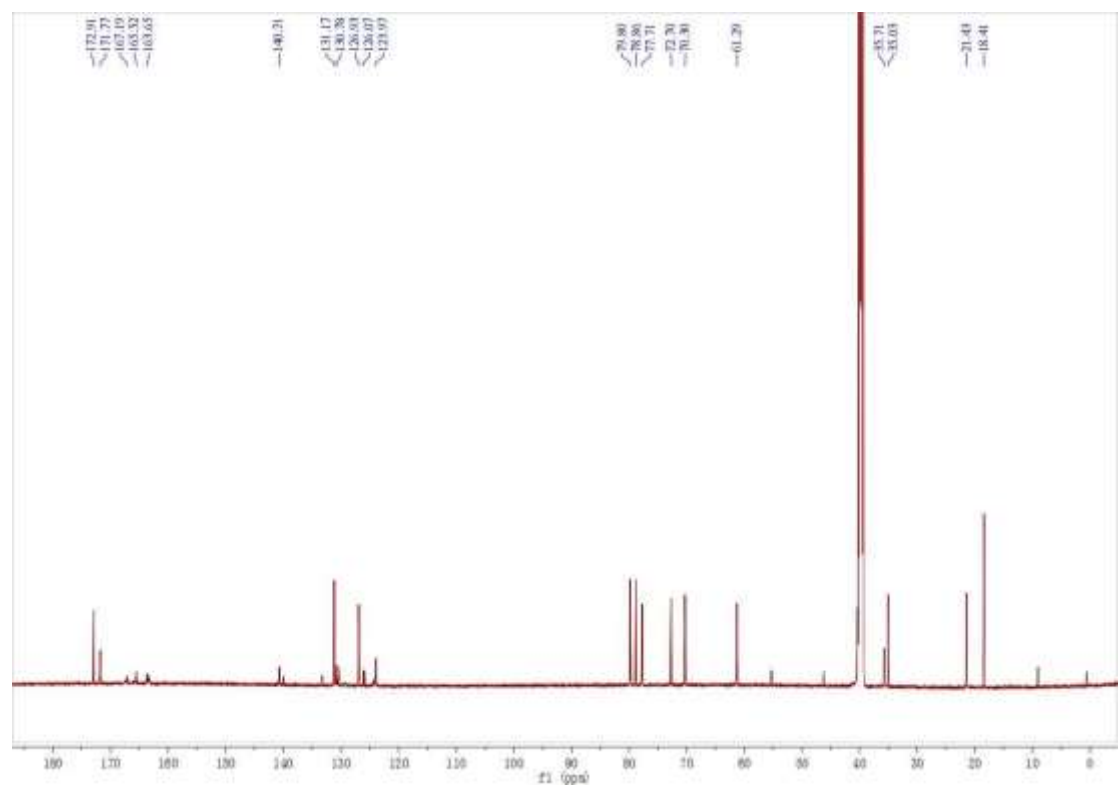

Figure S36. The  $^{13}\text{C}$ -NMR of compound 14g.

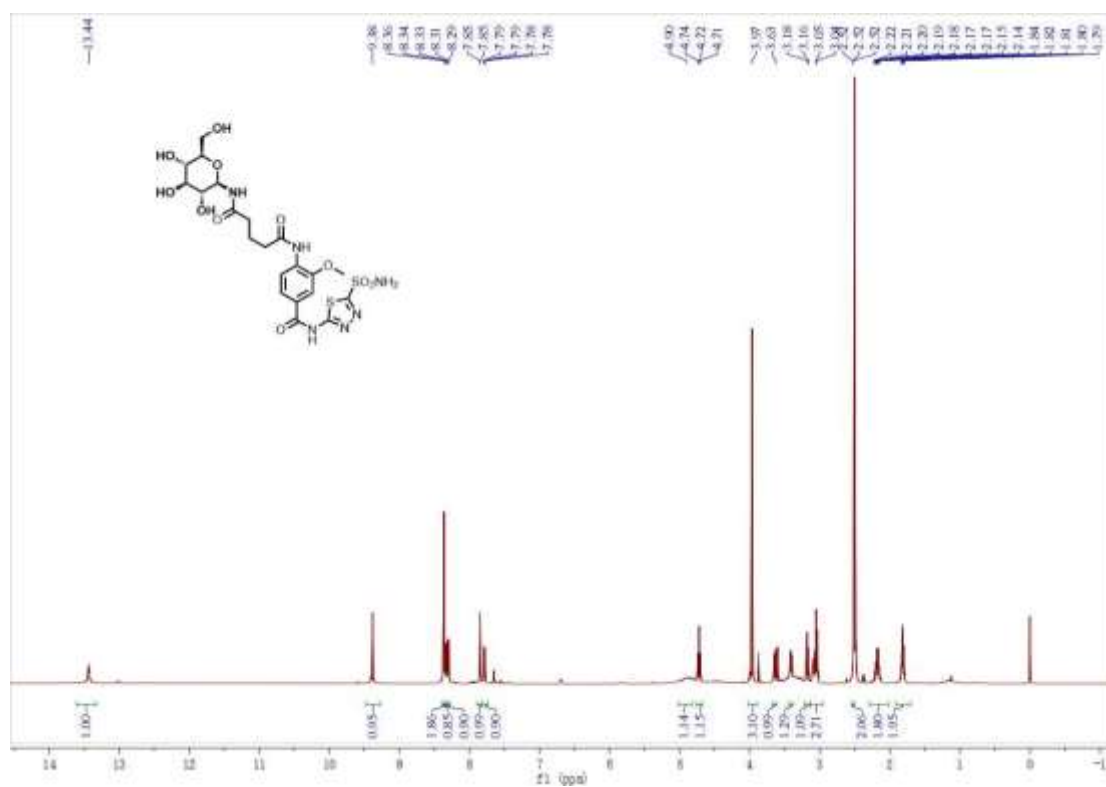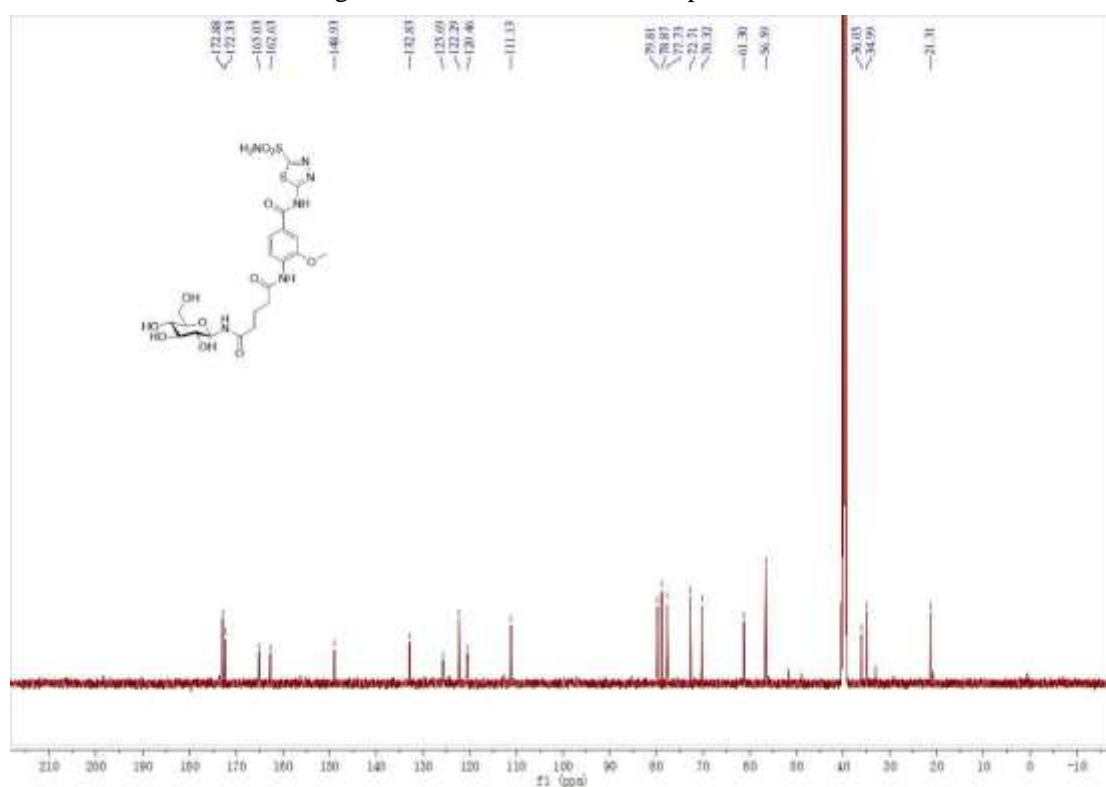

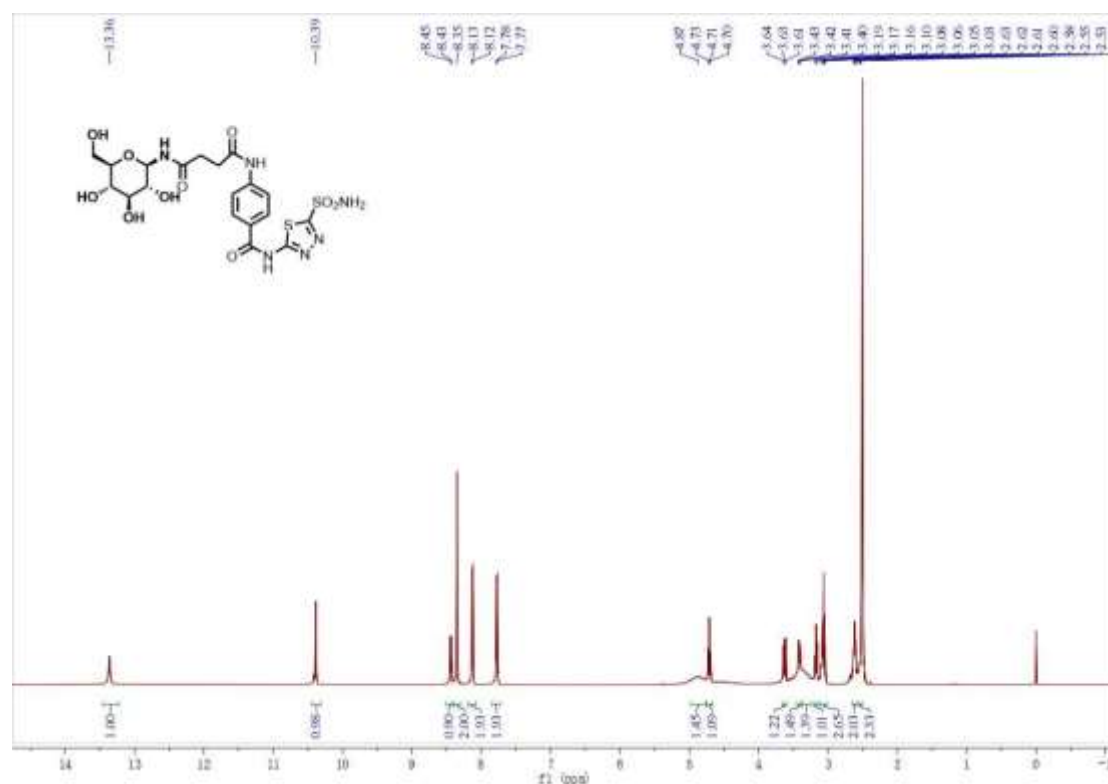

Figure S39. The <sup>1</sup>H-NMR of compound 14i.

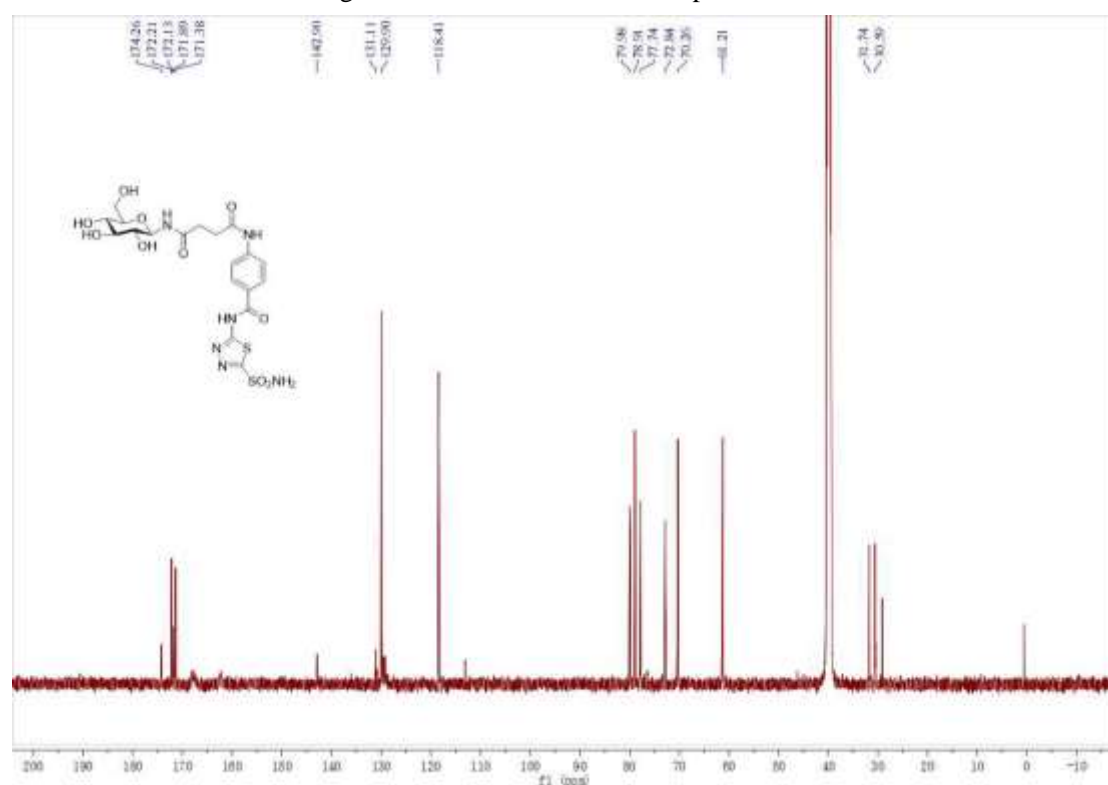

Figure S40. The <sup>13</sup>C-NMR of compound 14i.

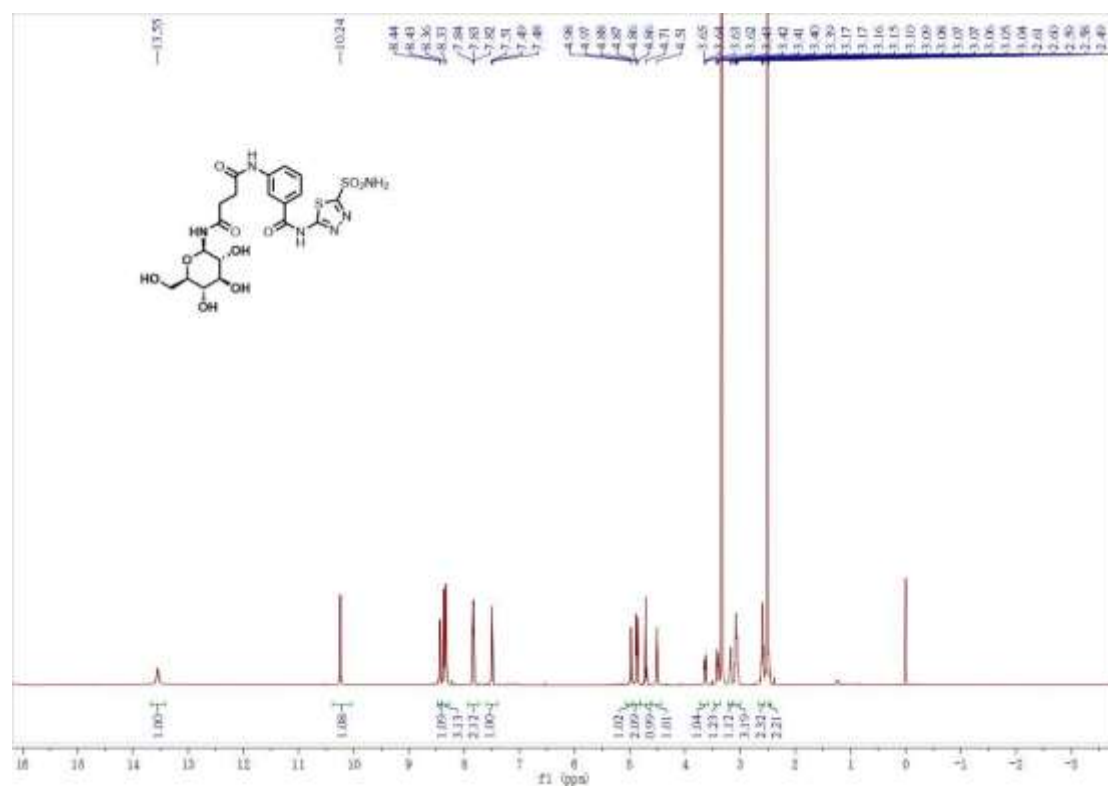

Figure S41. The <sup>1</sup>H-NMR of compound 14j.

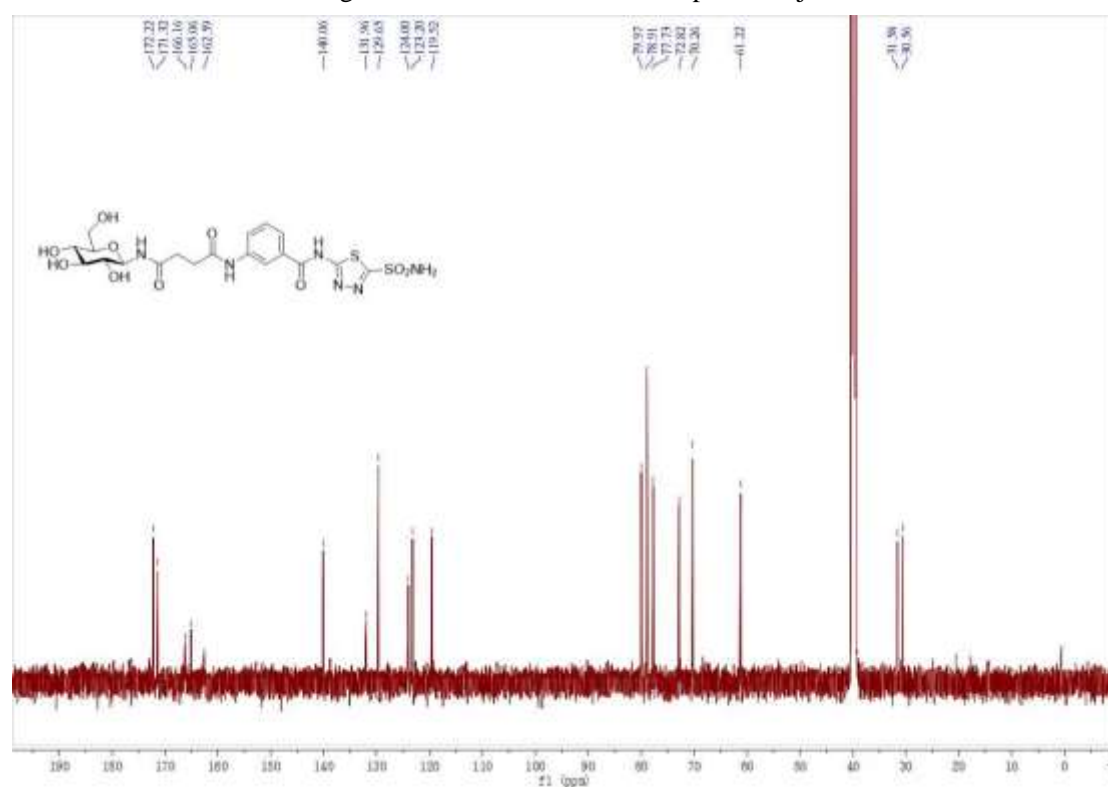

Figure S42. The <sup>13</sup>C-NMR of compound 14j.

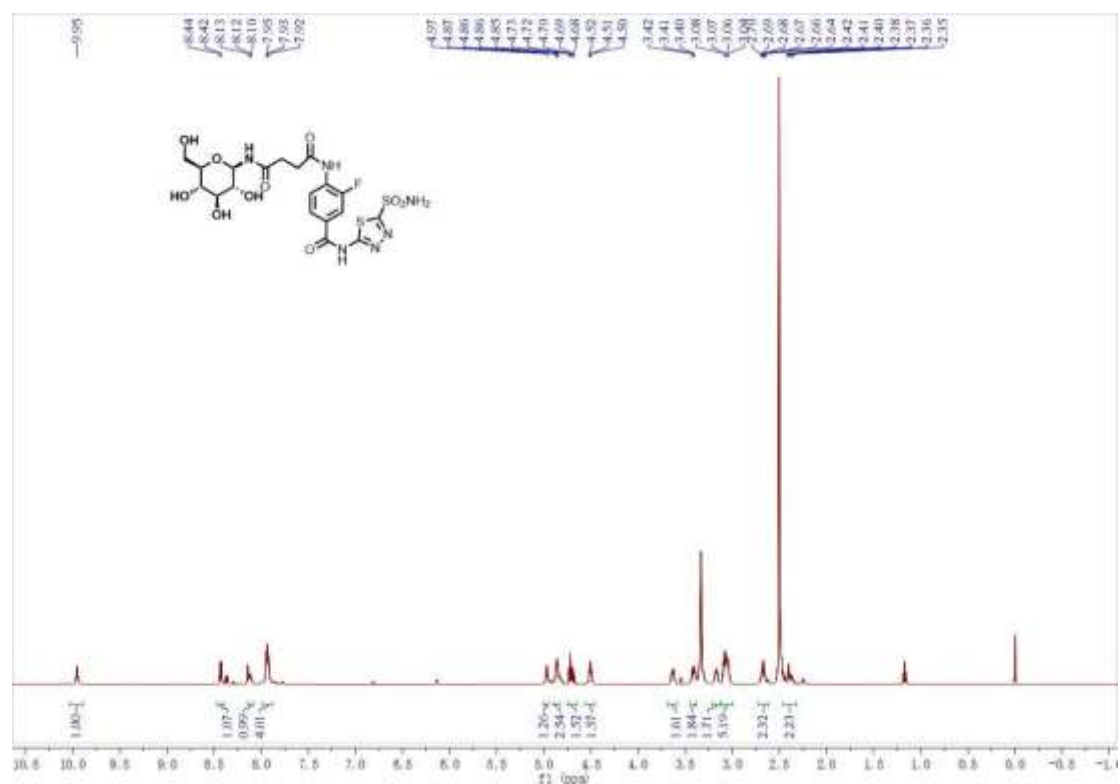

Figure S43. The  $^1\text{H}$ -NMR of compound 14k.

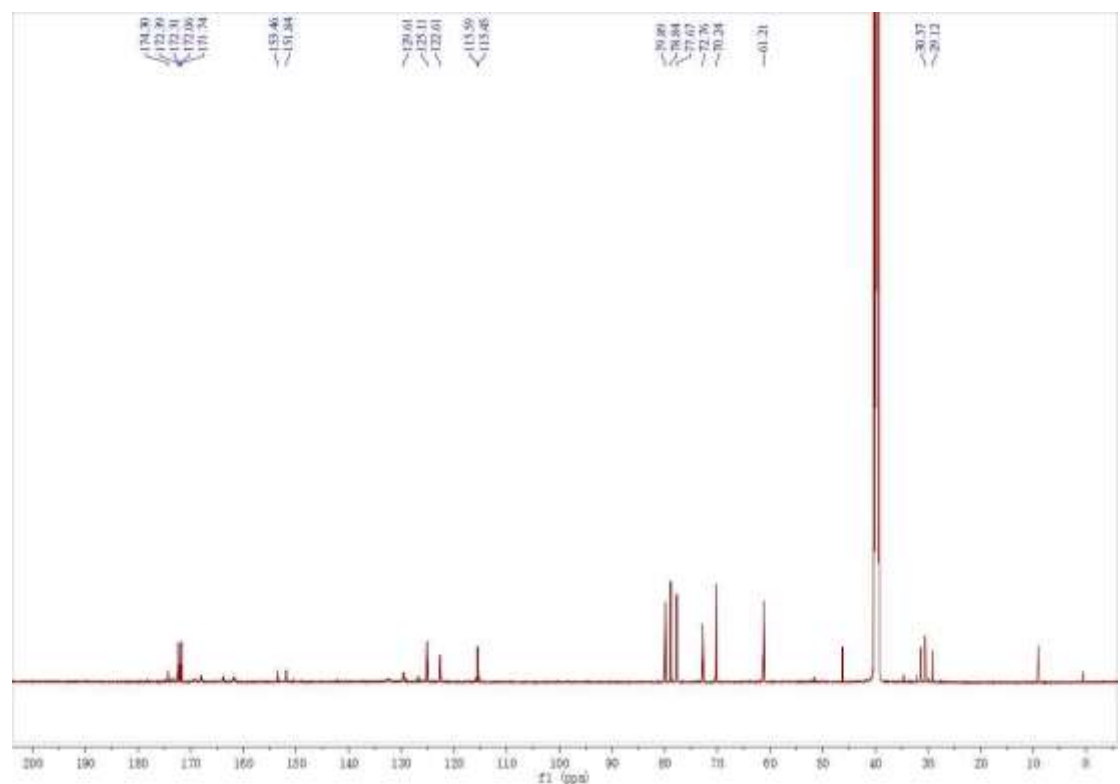

Figure S44. The  $^{13}\text{C}$ -NMR of compound 14k.

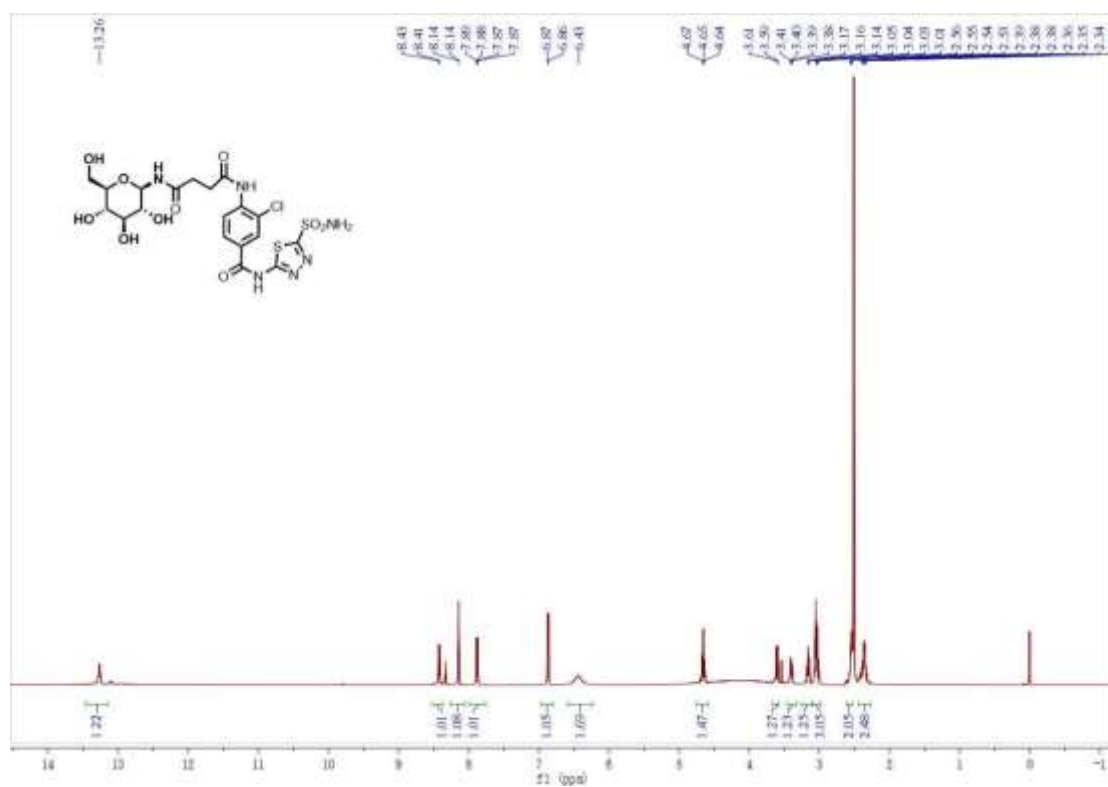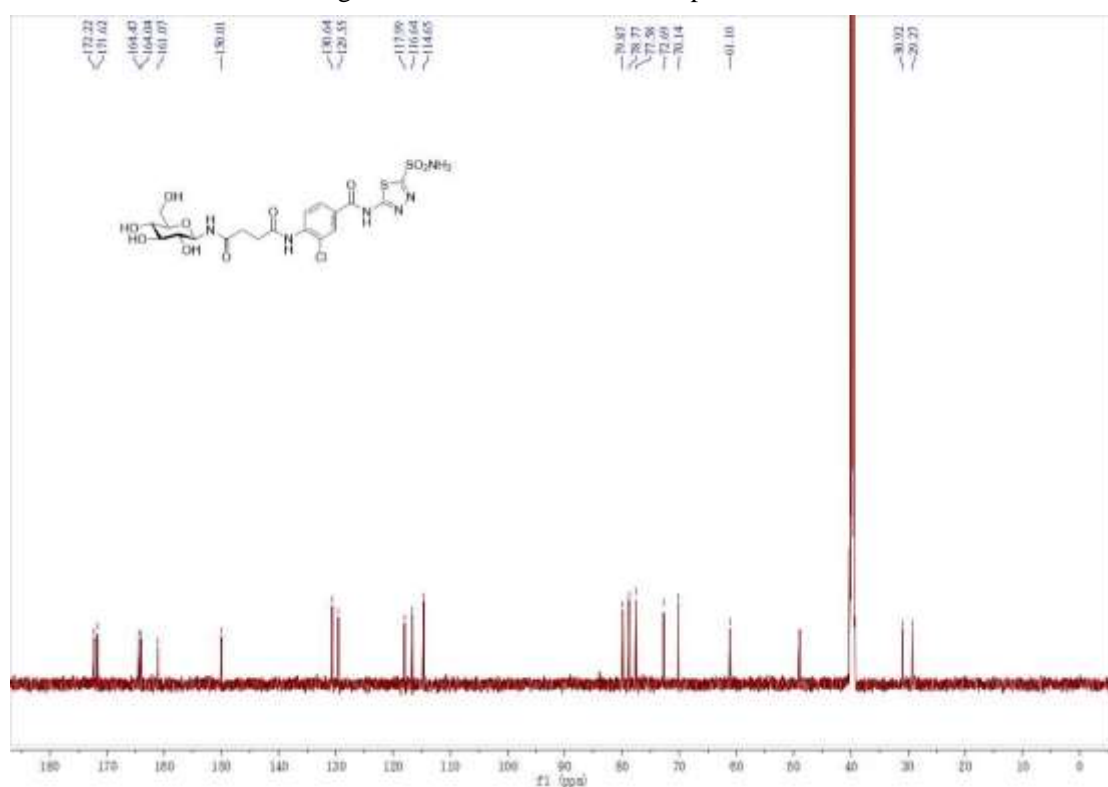



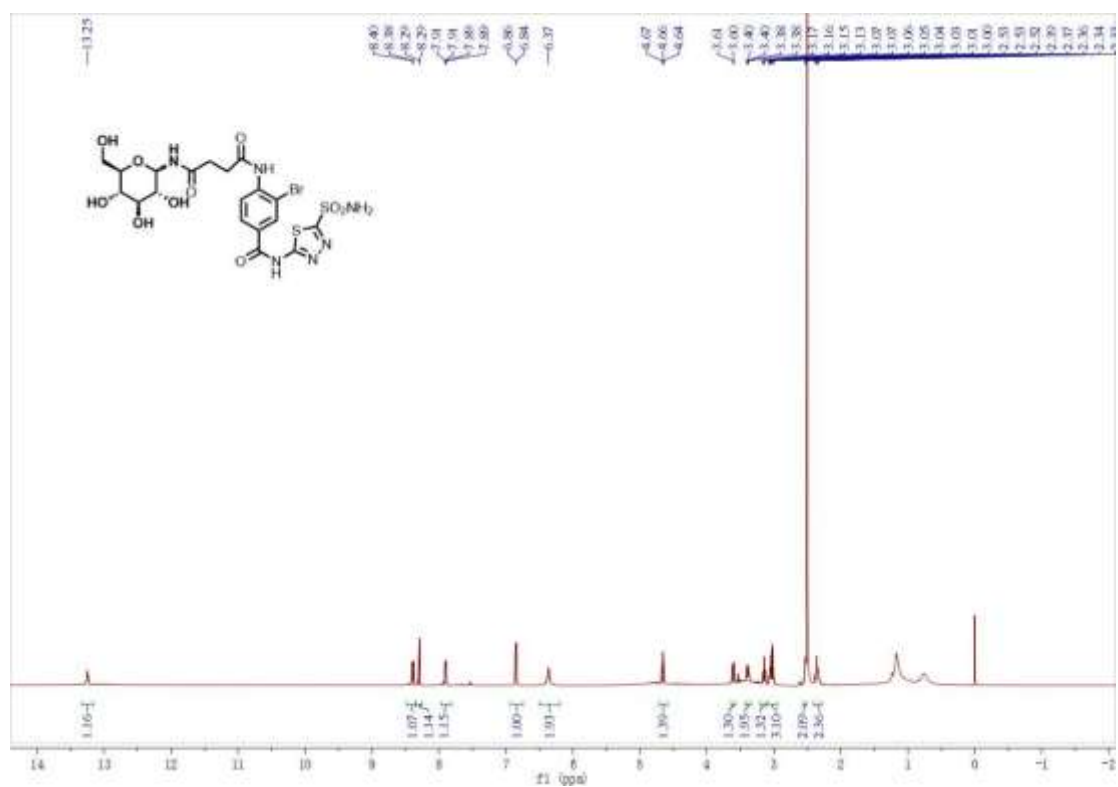

Figure S47. The  $^1\text{H}$ -NMR of compound 14m.

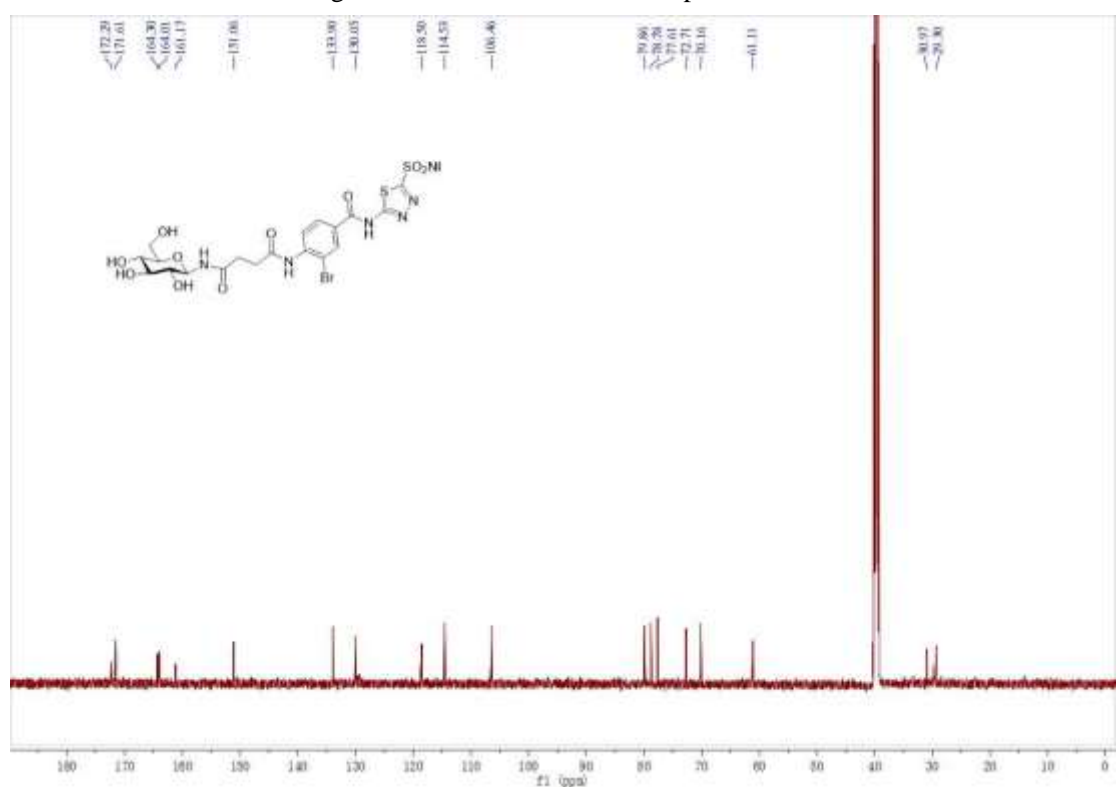

Figure S48. The  $^{13}\text{C}$ -NMR of compound 14m.

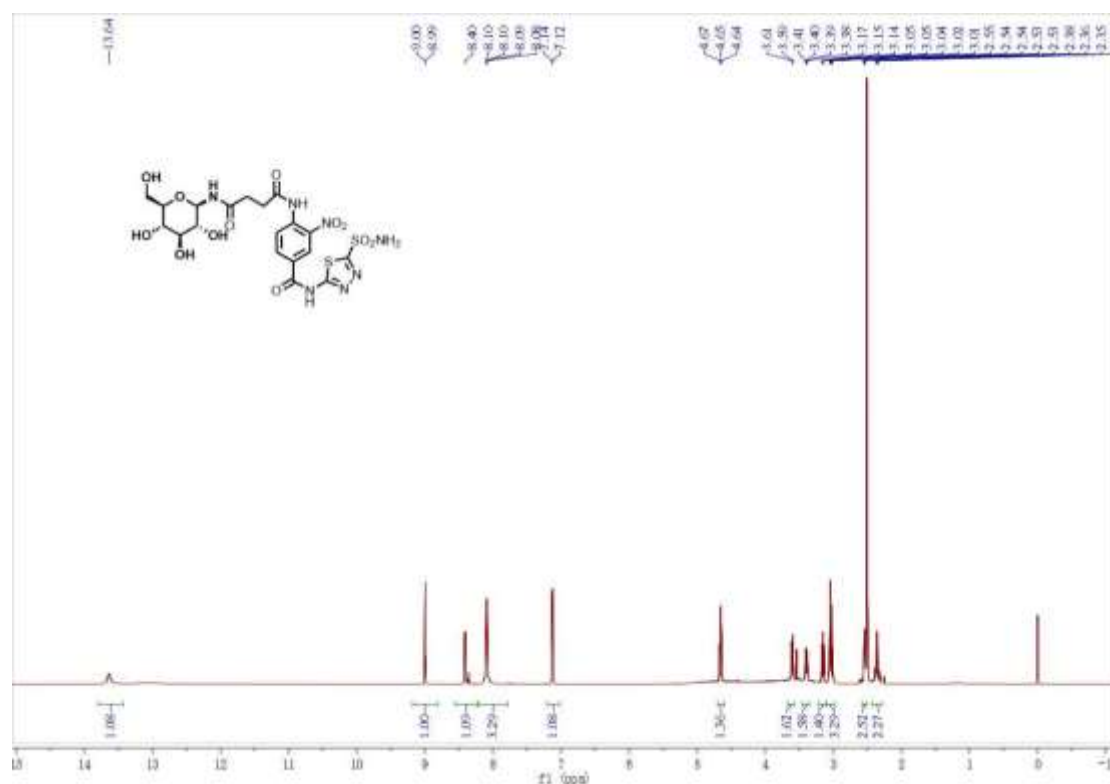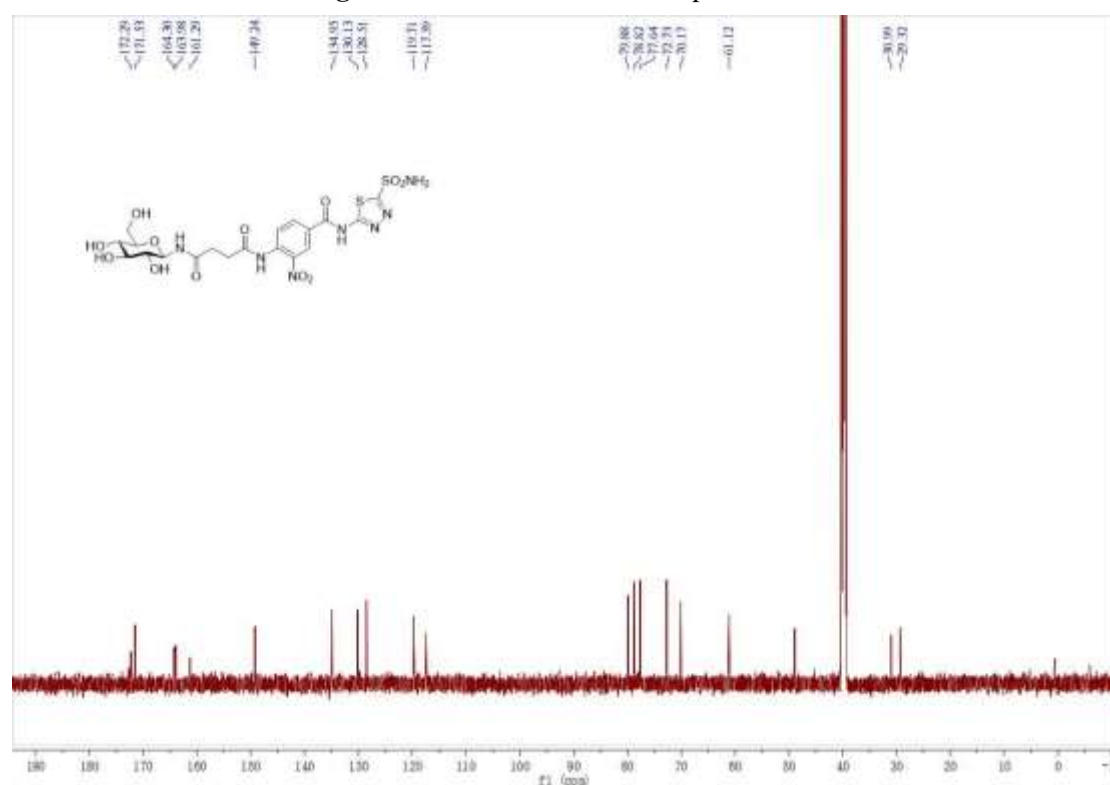

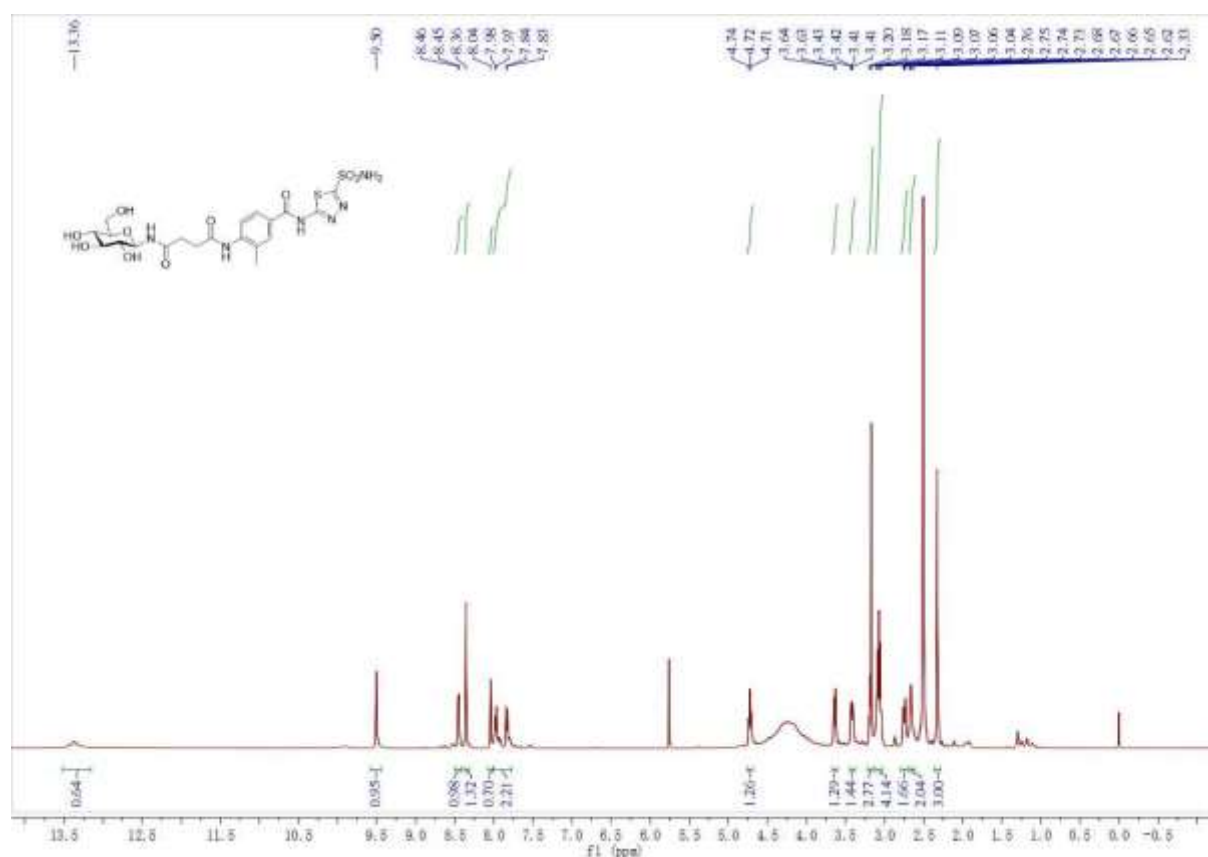

Figure S51. The  $^1\text{H}$ -NMR of compound 14o.

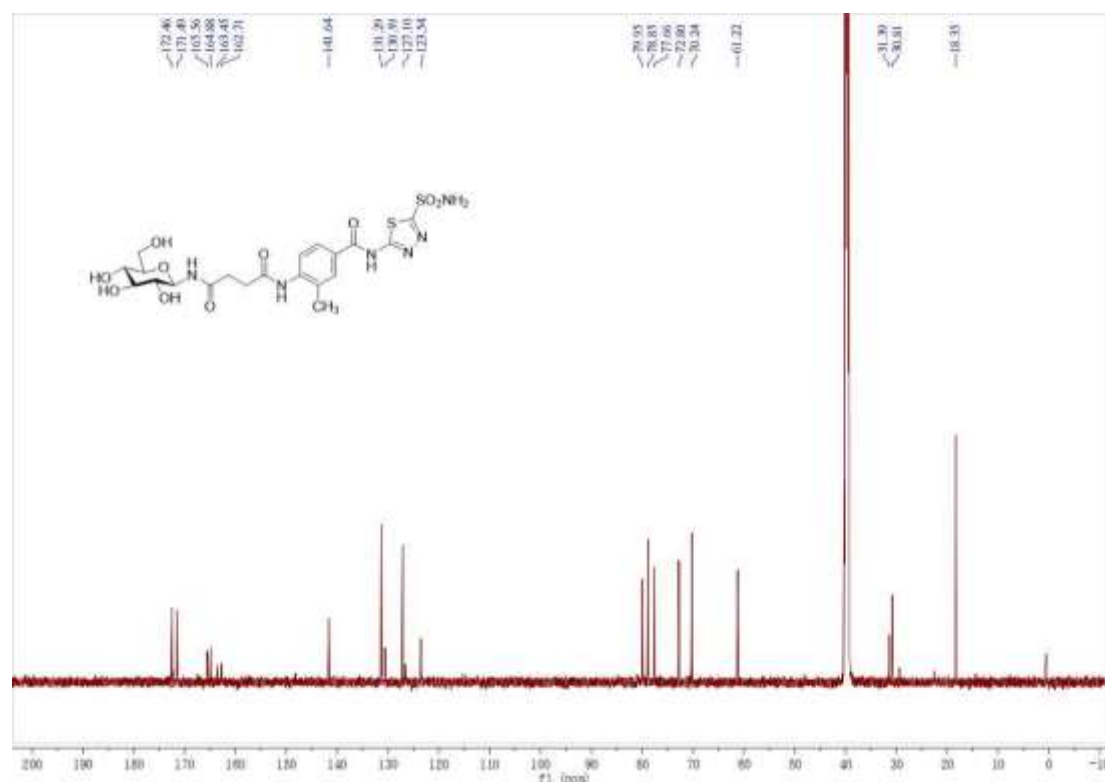

Figure S52. The  $^{13}\text{C}$ -NMR of compound 14o.

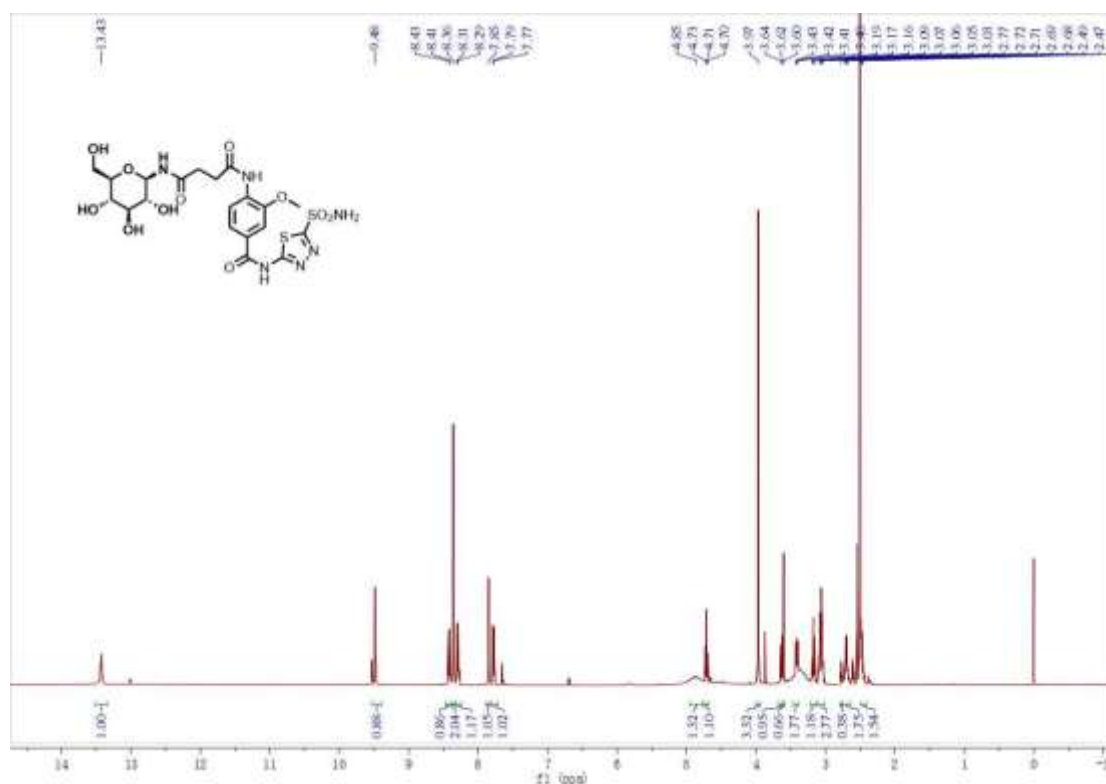

Figure S53. The  $^1\text{H}$ -NMR of compound 14p.

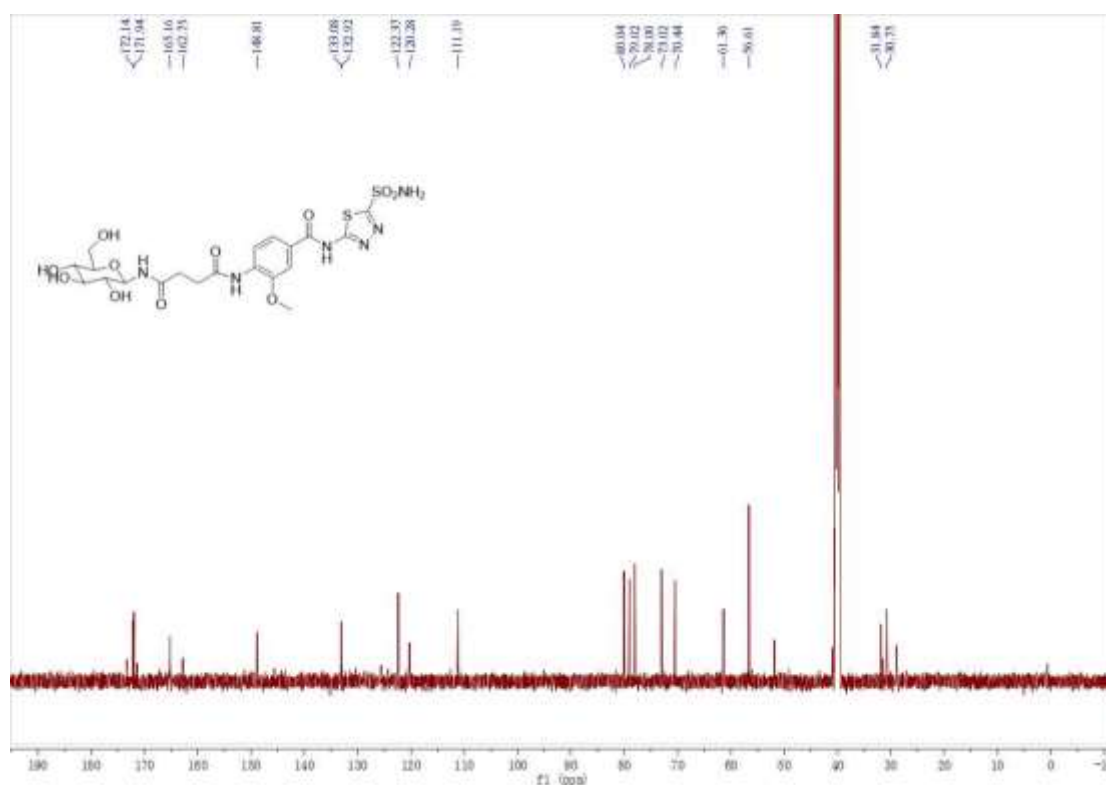

Figure S54. The  $^{13}\text{C}$ -NMR of compound 14p.

## 2D-NMR Spectra

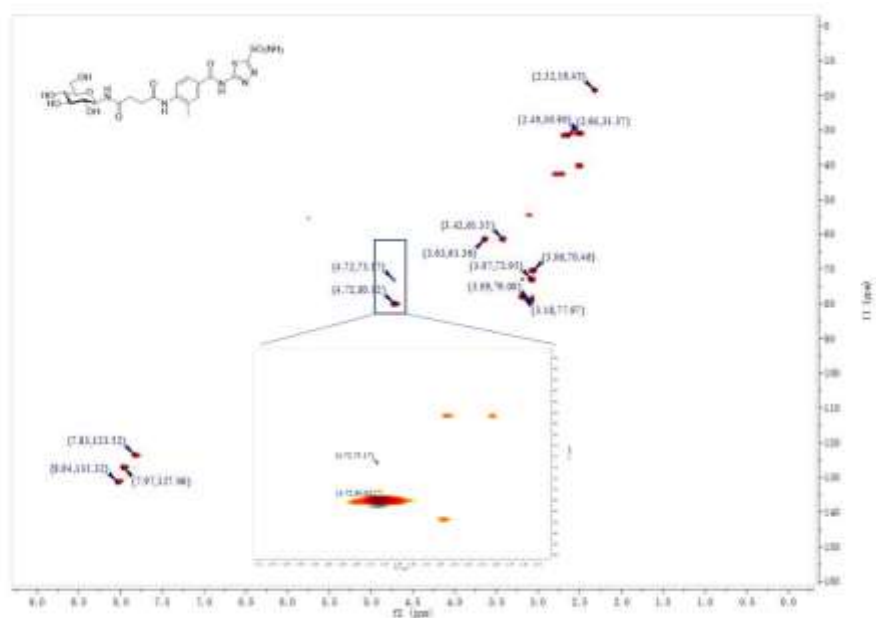

**Figure S55.** The HSQC spectra of compound 14o.

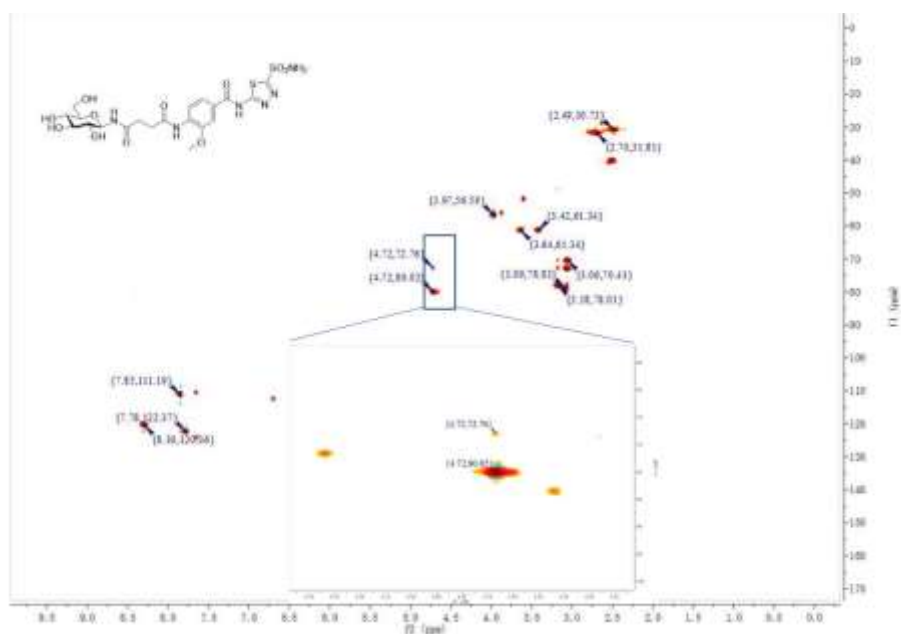

**Figure S56.** The HSQC spectra of compound 14p.

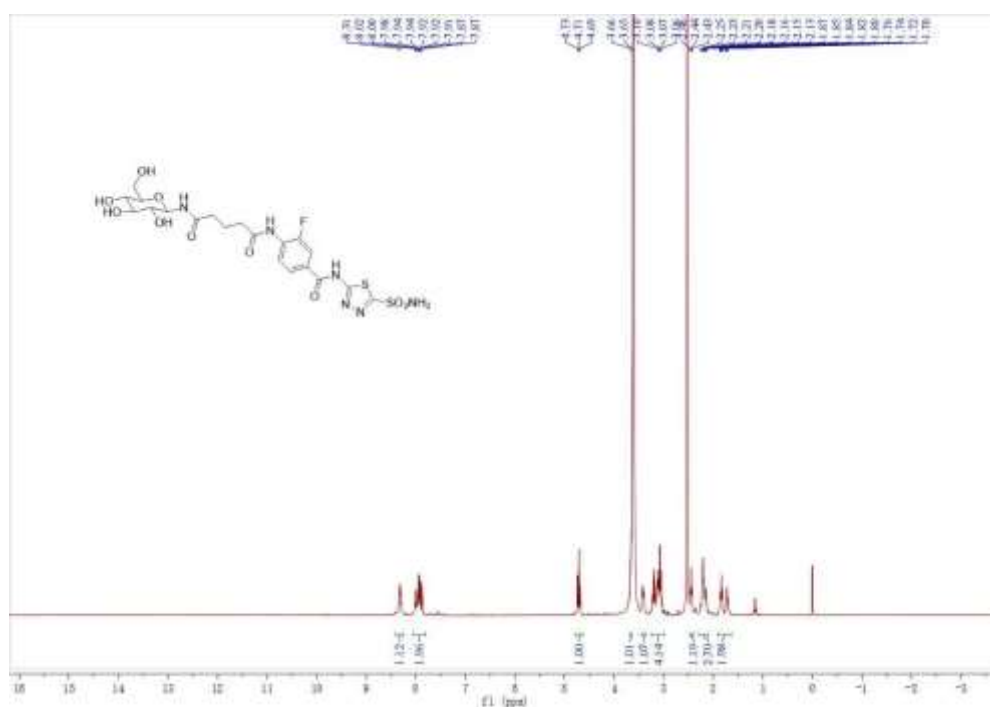

Figure S57. The  $^1\text{H}$ -NMR of compound 14c with  $\text{D}_2\text{O}$ -exchange.

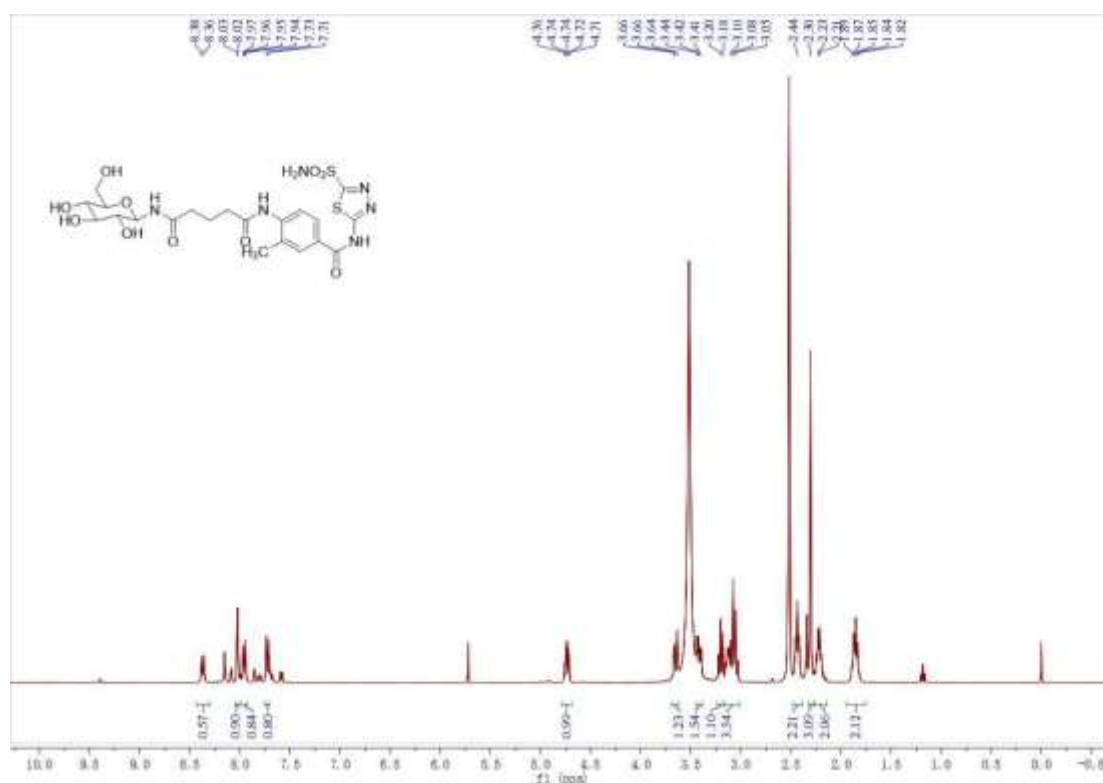

Figure S58. The  $^1\text{H}$ -NMR of compound 14g with  $\text{D}_2\text{O}$ -exchange.

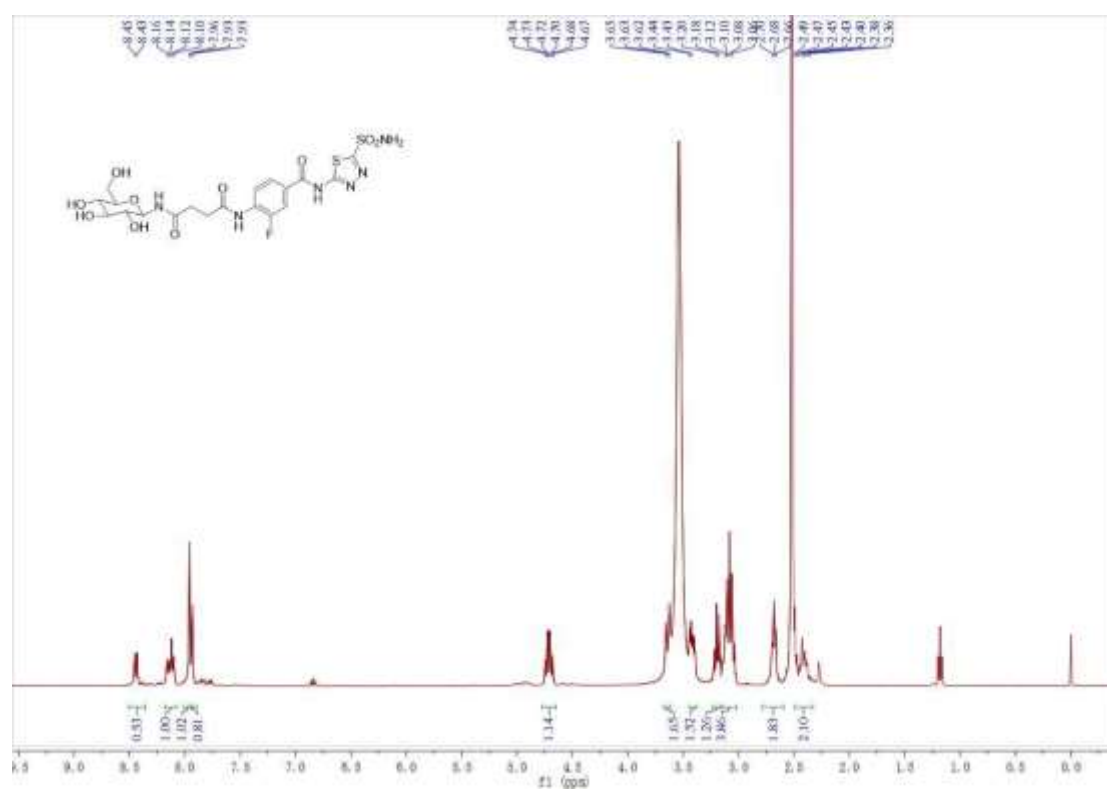

**Figure S59.** The <sup>1</sup>H-NMR of compound 14k with D<sub>2</sub>O-exchange.

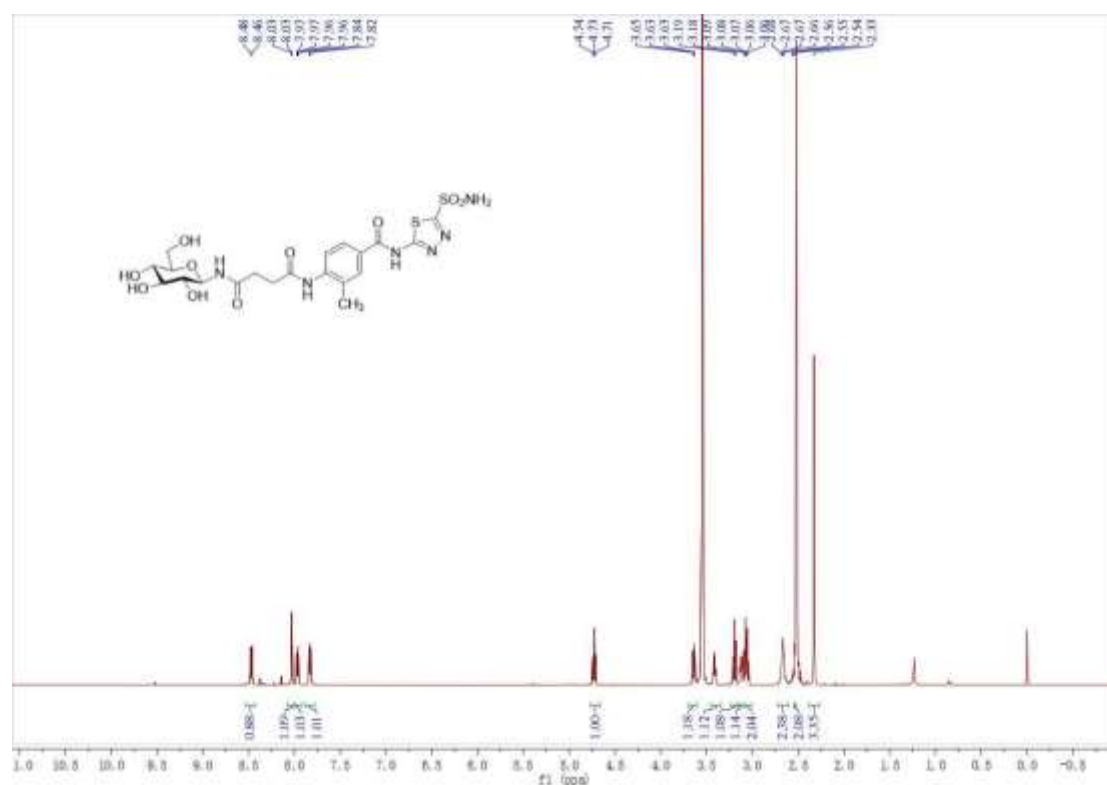

**Figure S60.** The <sup>1</sup>H-NMR of compound 14o with D<sub>2</sub>O-exchange.

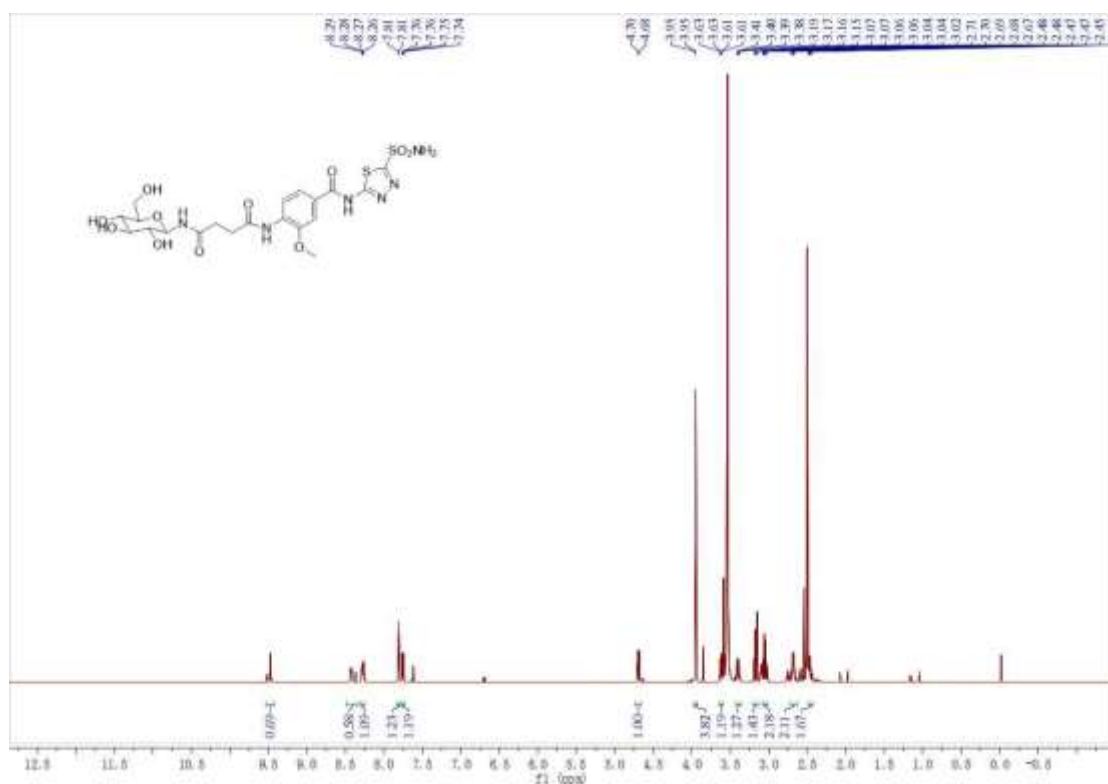

**Figure S61.** The  $^1\text{H}$ -NMR of compound 14p with  $\text{D}_2\text{O}$ -exchange.

## Modes of binding figures

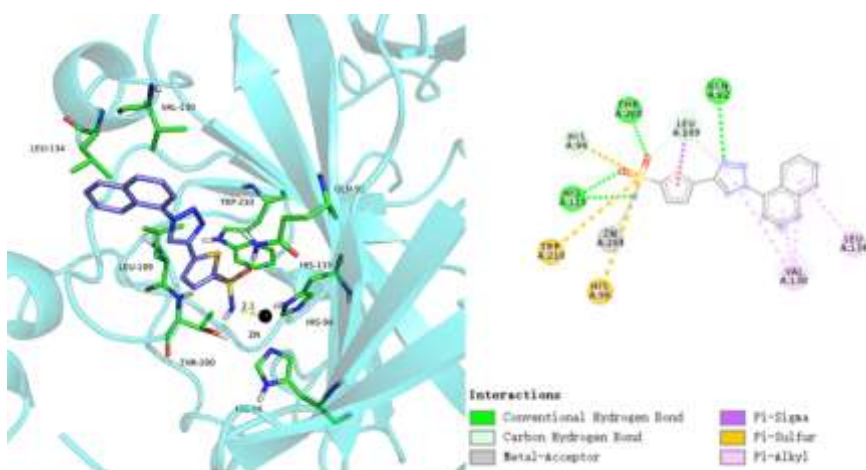

**Figure S62.** The modes of binding for co-crystal structure 5FL4 in CA IX.



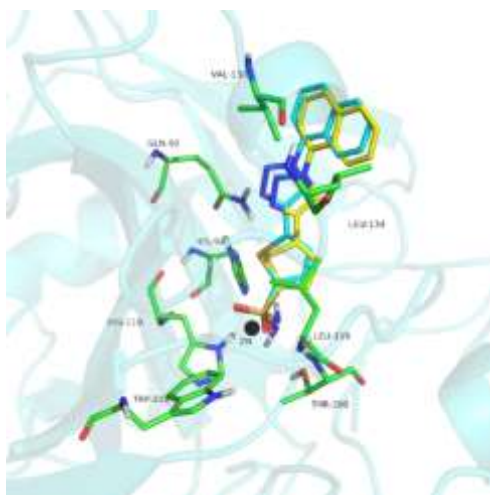

**Figure S63.** Co-crystallized pose (yellow) and the re-docked pose (blue) of 5FL4.

## Supplementary data

**Table S1.** Binding energy, hydrogen bonding interacting residues, H-binding distance, hydrophobic interacting residues of 14a, 14e and 14i.

| Compound | binding energy | hydrogen bonding interacting residues | H-binding distance (Å) | hydrophobic interacting residues   |
|----------|----------------|---------------------------------------|------------------------|------------------------------------|
| 14a      | -4.543         | Gln71                                 | 2.28856                | His68<br>His94<br>His96<br>Leu199  |
|          |                | Gln92                                 | 3.08217                |                                    |
|          |                | His119                                | 2.75462                |                                    |
|          |                | His119                                | 2.55636                |                                    |
|          |                | Thr200                                | 1.78295                |                                    |
| 14e      | -3.130         | Gln71                                 | 1.80873                | His94<br>His94<br>Leu199           |
|          |                | His119                                | 2.67012                |                                    |
|          |                | Thr200                                | 1.82586                |                                    |
|          |                | Thr201                                | 2.74211                |                                    |
|          |                | Thr201                                | 3.02351                |                                    |
| 14i      | -4.508         | Gln71                                 | 1.8855                 | His94<br>His96<br>Val121<br>Leu199 |
|          |                | Gln92                                 | 2.25552                |                                    |
|          |                | Gln92                                 | 2.62697                |                                    |
|          |                | Thr200                                | 1.8108                 |                                    |
|          |                | Thr201                                | 2.76773                |                                    |
|          |                | Asp131                                | 2.03706                |                                    |
|          |                | Asp131                                | 2.04039                |                                    |

**Table S2.** The IC<sub>50</sub> of Taxol

| Compound | HT-29     | MDA-MB-231 |
|----------|-----------|------------|
| Taxol    | 111 ng/mL | 99 ng/mL   |

**Table S3.** The calculated ADMET information of some compounds

| Compounds | ADMET<br>Solubility | ADMET<br>Solubility Level | ADMET<br>BBB Level | ADMET<br>Absorption Level | ADMET<br>clogP |
|-----------|---------------------|---------------------------|--------------------|---------------------------|----------------|
| 14a       | -4.668              | 2                         | 4                  | 3                         | -2.069         |
| 14b       | -4.784              | 2                         | 4                  | 3                         | -2.069         |
| 14c       | -5.6                | 2                         | 4                  | 3                         | -1.864         |
| 14g       | -5.079              | 2                         | 4                  | 3                         | -1.583         |
| 14i       | -5.23               | 2                         | 4                  | 3                         | -2.086         |
| 14j       | -4.565              | 2                         | 4                  | 3                         | -2.526         |
| 14h       | -4.675              | 2                         | 4                  | 3                         | -2.526         |
| 14p       | -5.146              | 2                         | 4                  | 3                         | -2.542         |
